# Supplementary material for: Identification of species and materia medica within Saussurea subg. Amphilaena based on DNA barcodes
Source: PeerJ. 2019 Feb 1;7:e6357. doi: 10.7717/peerj.6357 (PMC6361007; doi:10.7717/peerj.6357)
Supplement: Supplemental Information 1 [file peerj-07-6357-s001.zip]

Archive with 62 entries (61 files):
- Supporting Information/
- Supporting Information/~$ Microsoft Word ╬─╡╡.docx
- Supporting Information/Fig. S1.pdf
- Supporting Information/Fig. S10.pdf
- Supporting Information/Fig. S11.pdf
- Supporting Information/Fig. S12.pdf
- Supporting Information/Fig. S13.pdf
- Supporting Information/Fig. S14.pdf
- Supporting Information/Fig. S15.pdf
- Supporting Information/Fig. S16.pdf
- Supporting Information/Fig. S17.pdf
- Supporting Information/Fig. S18.pdf
- Supporting Information/Fig. S19.pdf
- Supporting Information/Fig. S2.pdf
- Supporting Information/Fig. S20.pdf
- Supporting Information/Fig. S21.pdf
- Supporting Information/Fig. S22.pdf
- Supporting Information/Fig. S23.pdf
- Supporting Information/Fig. S24.pdf
- Supporting Information/Fig. S25.pdf
- Supporting Information/Fig. S26.pdf
- Supporting Information/Fig. S27.pdf
- Supporting Information/Fig. S28.pdf
- Supporting Information/Fig. S29.pdf
- Supporting Information/Fig. S3.pdf
- Supporting Information/Fig. S30.pdf
- Supporting Information/Fig. S31.pdf
- Supporting Information/Fig. S32.pdf
- Supporting Information/Fig. S33.pdf
- Supporting Information/Fig. S34.pdf
- Supporting Information/Fig. S35.pdf
- Supporting Information/Fig. S36.pdf
- Supporting Information/Fig. S37.pdf
- Supporting Information/Fig. S38.pdf
- Supporting Information/Fig. S39.pdf
- Supporting Information/Fig. S4.pdf
- Supporting Information/Fig. S40.pdf
- Supporting Information/Fig. S41.pdf
- Supporting Information/Fig. S42.pdf
- Supporting Information/Fig. S43.pdf
- Supporting Information/Fig. S44.pdf
- Supporting Information/Fig. S45.pdf
- Supporting Information/Fig. S46.pdf
- Supporting Information/Fig. S47.pdf
- Supporting Information/Fig. S48.pdf
- Supporting Information/Fig. S49.pdf
- Supporting Information/Fig. S5.pdf
- Supporting Information/Fig. S50.pdf
- Supporting Information/Fig. S51.pdf
- Supporting Information/Fig. S52.pdf
- Supporting Information/Fig. S53.pdf
- Supporting Information/Fig. S54.pdf
- Supporting Information/Fig. S55.pdf
- Supporting Information/Fig. S56.pdf
- Supporting Information/Fig. S57.pdf
- Supporting Information/Fig. S58.pdf
- Supporting Information/Fig. S59.pdf
- Supporting Information/Fig. S6.pdf
- Supporting Information/Fig. S7.pdf
- Supporting Information/Fig. S8.pdf
- Supporting Information/Fig. S9.pdf
- Supporting Information/Figure legends.pdf
