# Supplementary material for: Identification of species and materia medica within Saussurea subg. Amphilaena based on DNA barcodes
Source: PeerJ journal article supplement (doi:10.7717/peerj.6357), 2019-02-01
Supplement: Supporting_information.zip [file Supporting_information.zip]

Fig. S1. BI tree based on *matK*.  
Fig. S2. BI tree based on *psbA*.  
Fig. S3. BI tree based on *rbcL*.  
Fig. S4. BI tree based on *trnK*.  
Fig. S5. BI tree based on ITS+*matK*.  
Fig. S6. BI tree based on ITS+*psbA*.  
Fig. S7. BI tree based on ITS+*trnK*.  
Fig. S8. BI tree based on *matK*+*psbA*.  
Fig. S9. BI tree based on *matK*+*rbcL*.  
Fig. S10. BI tree based on *matK*+*trnK*.  
Fig. S11. BI tree based on *psbA* +*trnK*.  
Fig. S12. BI tree based on *psbA*+*rbcL*.  
Fig. S13. BI tree based on *rbcL*+*trnK*.  
Fig. S14. BI tree based on *matK*+*psbA*+*rbcL*.  
Fig. S15. BI tree based on *rbcL*+*trnK*+*psbA*.  
Fig. S16. BI tree based on *rbcL*+*trnK*+*matK*.  
Fig. S17. BI tree based on *matK*+*psbA*+*trnK*.  
Fig. S18. BI tree based on ITS+*trnK*+*psbA*.  
Fig. S19. BI tree based on ITS+*rbcL*+*trnK*.  
Fig. S20. BI tree based on ITS+*psbA*+*rbcL*+*trnK*.  
Fig. S21. BI tree based on ITS+*psbA*+*rbcL*.  
Fig. S22. BI tree based on ITS+*matK*+*psbA*.  
Fig. S23. BI tree based on ITS+*matK*+*rbcL*.  
Fig. S24. BI tree based on ITS+*matK*+*trnK*.  
Fig. S25. BI tree based on ITS+*matK*+*psbA*+*rbcL*.  
Fig. S26. BI tree based on ITS+*matK*+*psbA*+*trnK*.  
Fig. S27. BI tree based on ITS+*matK*+*trnK*+*rbcL*.  
Fig. S28. BI tree based on ITS+*psbA*+*matK*+*trnK*+*rbcL*.  
Fig. S29. NJ tree based on ITS.  
Fig. S30. NJ tree based on *trnK*.  
Fig. S31. NJ tree based on *matK*.  
Fig. S32. NJ tree based on *psbA*.  
Fig. S33. NJ tree based on *rbcL*.  
Fig. S34. NJ tree based on ITS+*matK*.  
Fig. S35. NJ tree based on ITS+*psbA*.  
Fig. S36. NJ tree based on ITS+*rbcL*.  
Fig. S37. NJ tree based on ITS+*trnK*.  
Fig. S38. NJ tree based on *matK*+*psbA*.  
Fig. S39. NJ tree based on *matK*+*rbcL*.  
Fig. S40. NJ tree based on *matK*+*trnK*.  
Fig. S41. NJ tree based on *psbA*+*rbcL*.  
Fig. S42. NJ tree based on *psbA*+*trnK*.  
Fig. S43. NJ tree based on *rbcL*+*trnK*.  
Fig. S44. NJ tree based on ITS+*matK*+*psbA*.

Fig. S45. NJ tree based on ITS+*matK*+*rbcL*.  
Fig. S46. NJ tree based on ITS+*matK*+*trnK*.  
Fig. S47. NJ tree based on ITS+*rbcL*+*psbA*.  
Fig. S48. NJ tree based on ITS+*rbcL*+*trnK*.  
Fig. S49. NJ tree based on ITS+*trnK*+*psbA*.  
Fig. S50. NJ tree based on *matK*+*psbA*+*rbcL*.  
Fig. S51. NJ tree based on *matK*+*psbA*+*trnK*.  
Fig. S52. NJ tree based on *rbcL*+*trnK*+*matK*.  
Fig. S53. NJ tree based on *rbcL*+*trnK*+*psbA*.  
Fig. S54. NJ tree based on ITS+*matK*+*psbA*+*rbcL*.  
Fig. S55. NJ tree based on ITS+*matK*+*psbA*+*trnK*.  
Fig. S56. NJ tree based on ITS+*matK*+*rbcL*+*trnK*.  
Fig. S57. NJ tree based on ITS+*rbcL*+*trnK*+*psbA*.  
Fig. S58. NJ tree based on *rbcL*+*trnK*+*psbA*+*matK*.  
Fig. S59. NJ tree based on ITS+*psbA*+*matK*+*trnK*+*rbcL*.
