# Supplementary figures and images for: Identification of species and materia medica within Saussurea subg. Amphilaena based on DNA barcodes
Source: PeerJ journal article supplement (doi:10.7717/peerj.6357), 2019-02-01

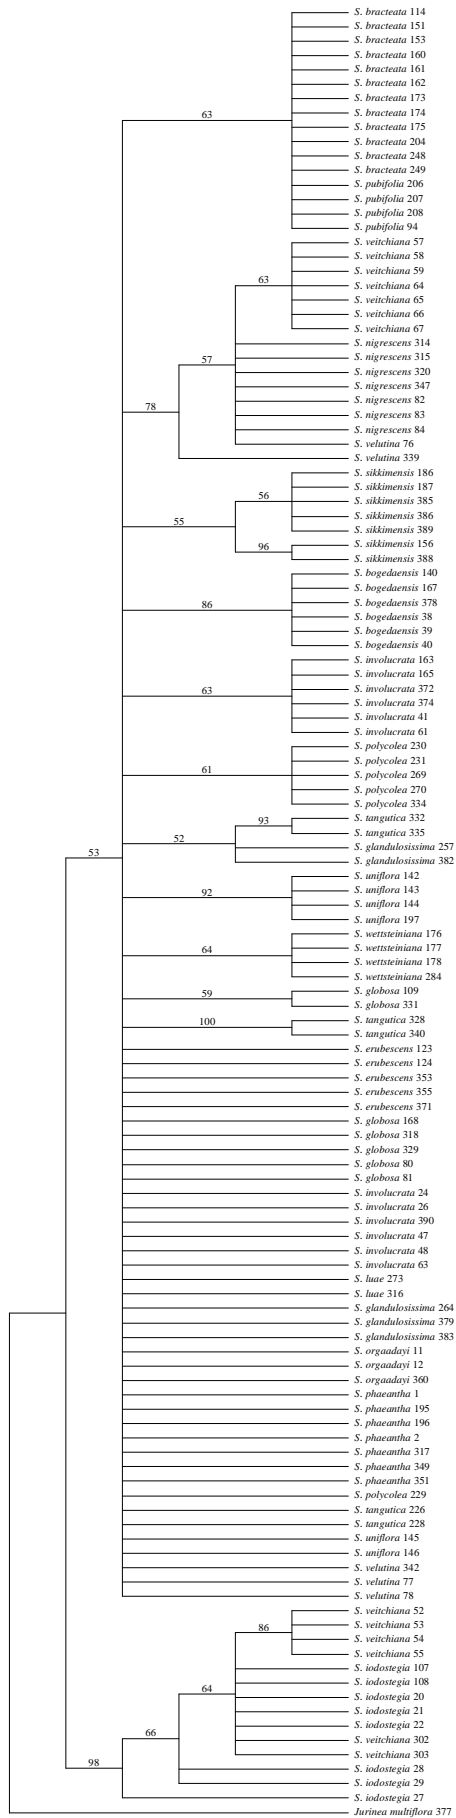

Supplement: Supporting_information.zip [file Supporting_information.zip]

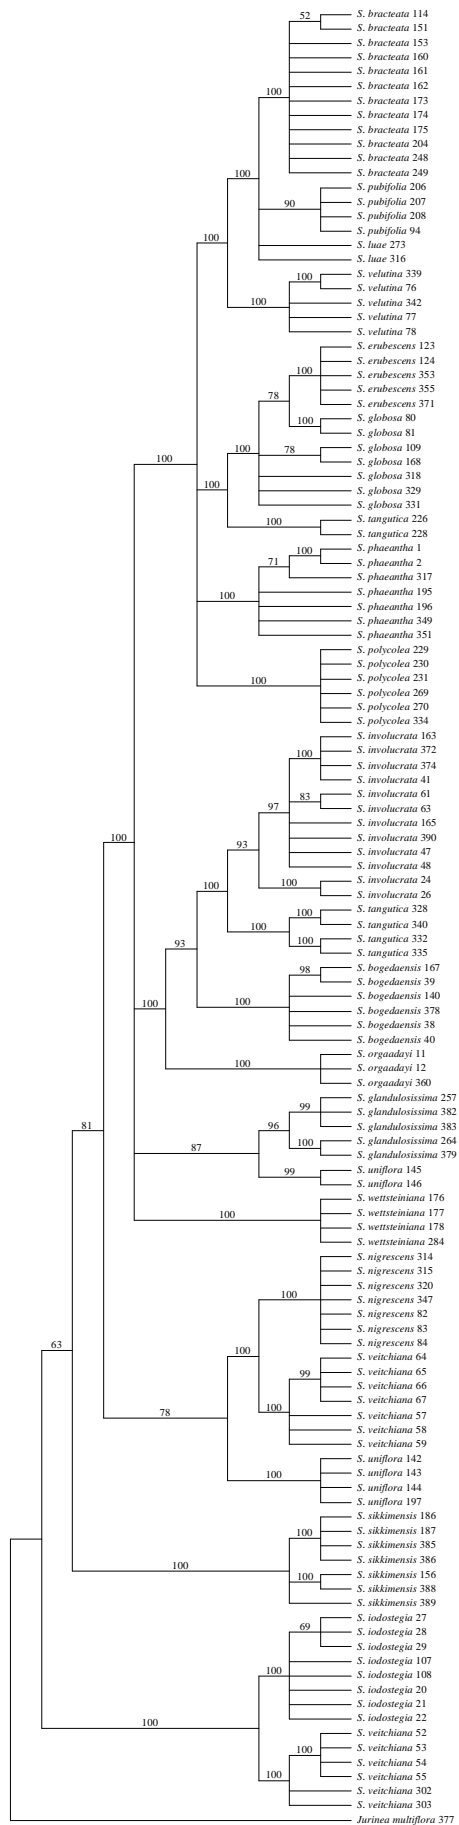

Supplement: Supporting_information.zip [file Supporting_information.zip]

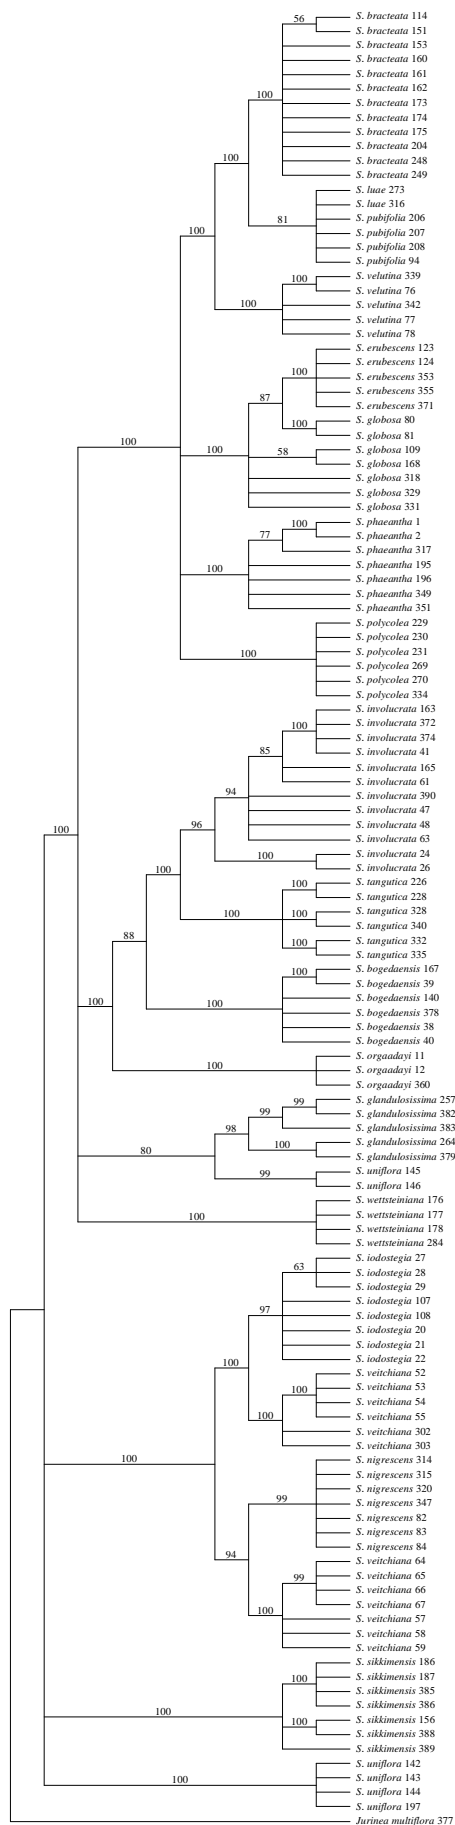

Supplement: Supporting_information.zip [file Supporting_information.zip]

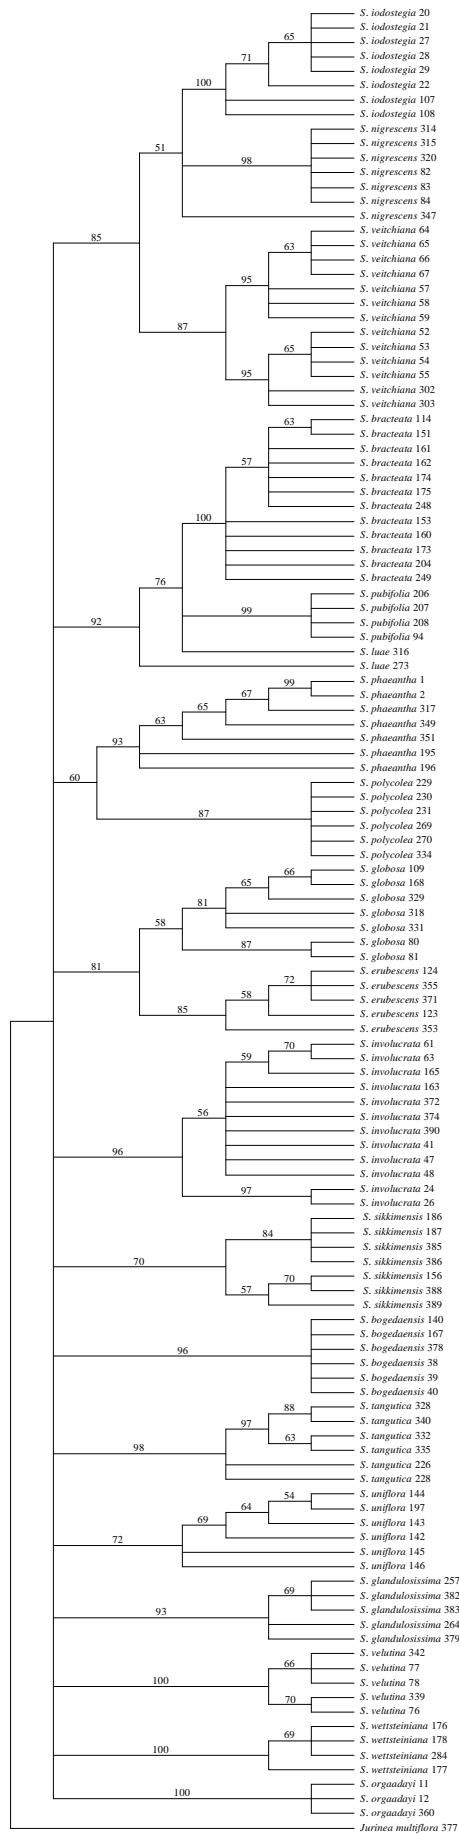

Supplement: Supporting_information.zip [file Supporting_information.zip]

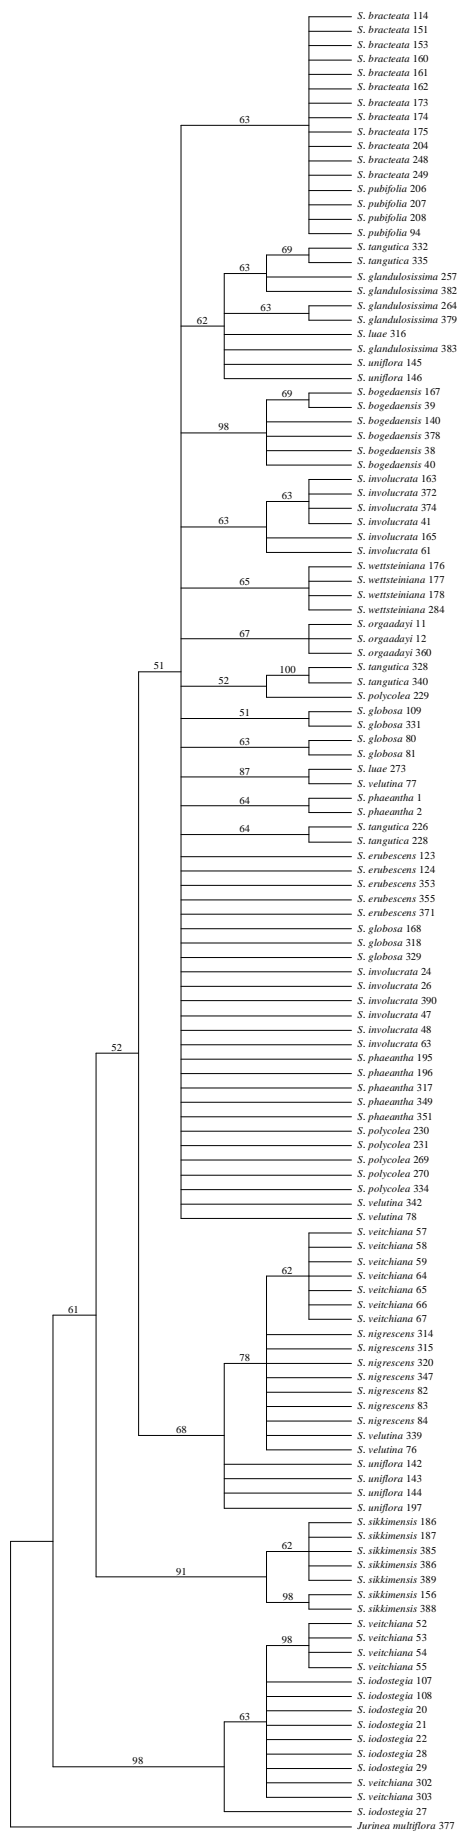

Supplement: Supporting_information.zip [file Supporting_information.zip]

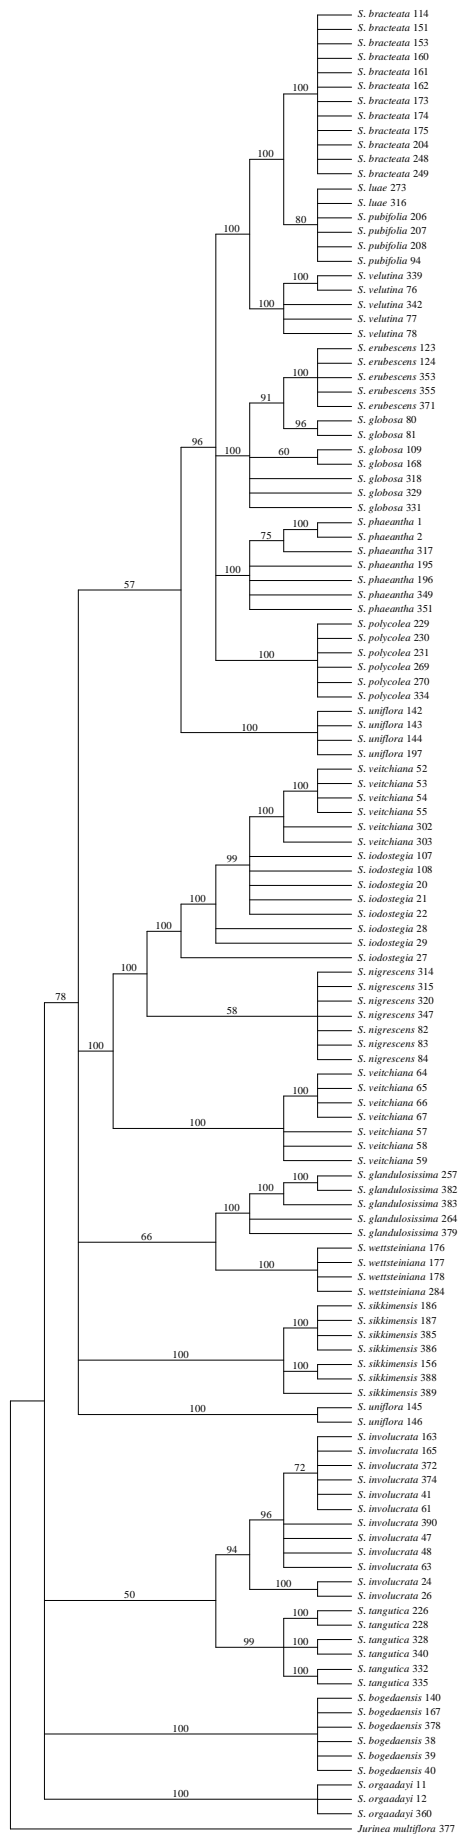

Supplement: Supporting_information.zip [file Supporting_information.zip]

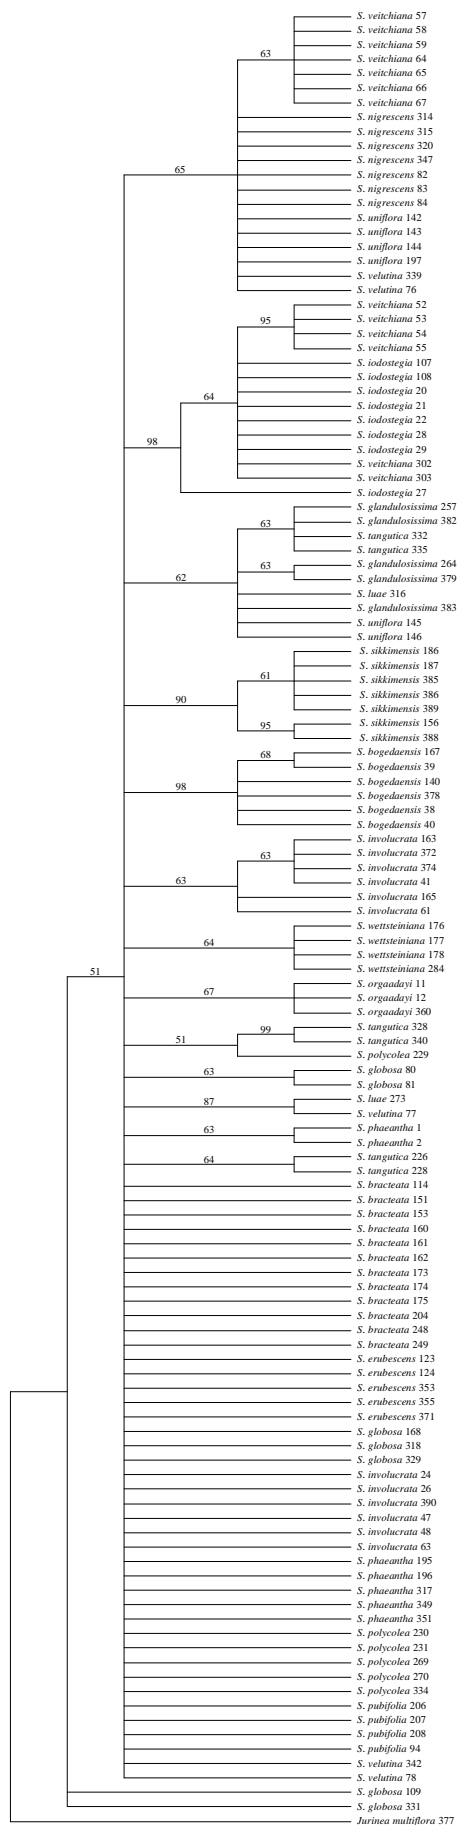

Supplement: Supporting_information.zip [file Supporting_information.zip]

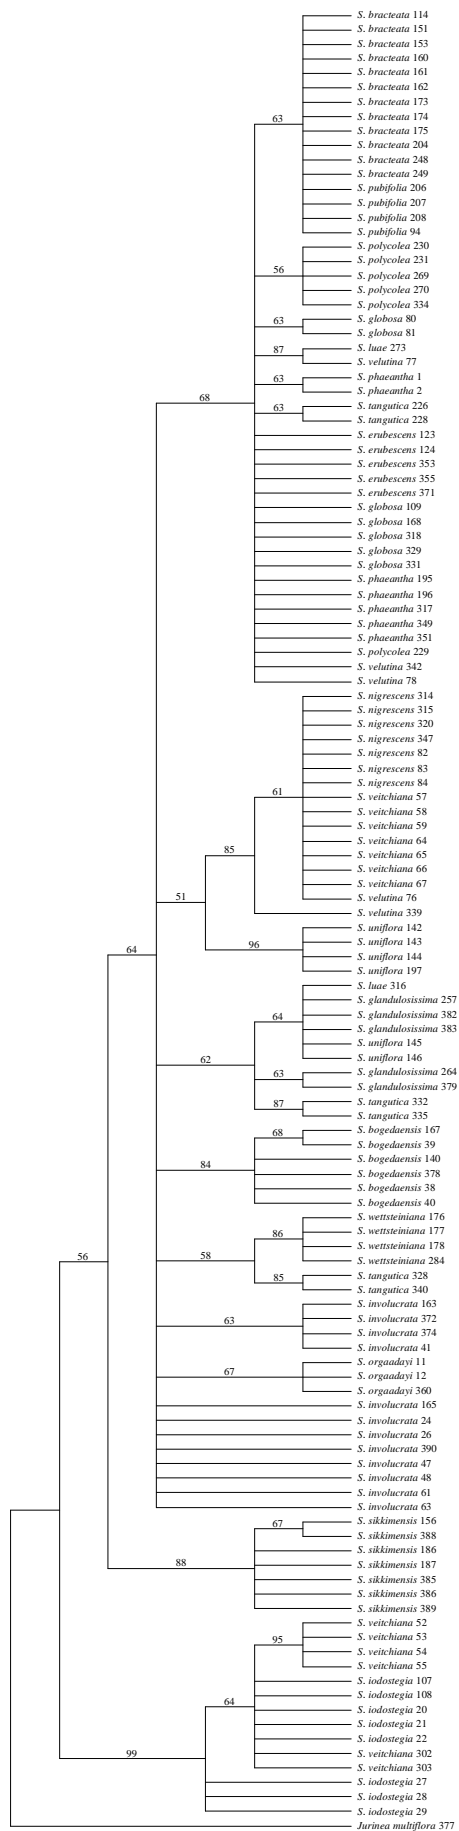

Supplement: Supporting_information.zip [file Supporting_information.zip]

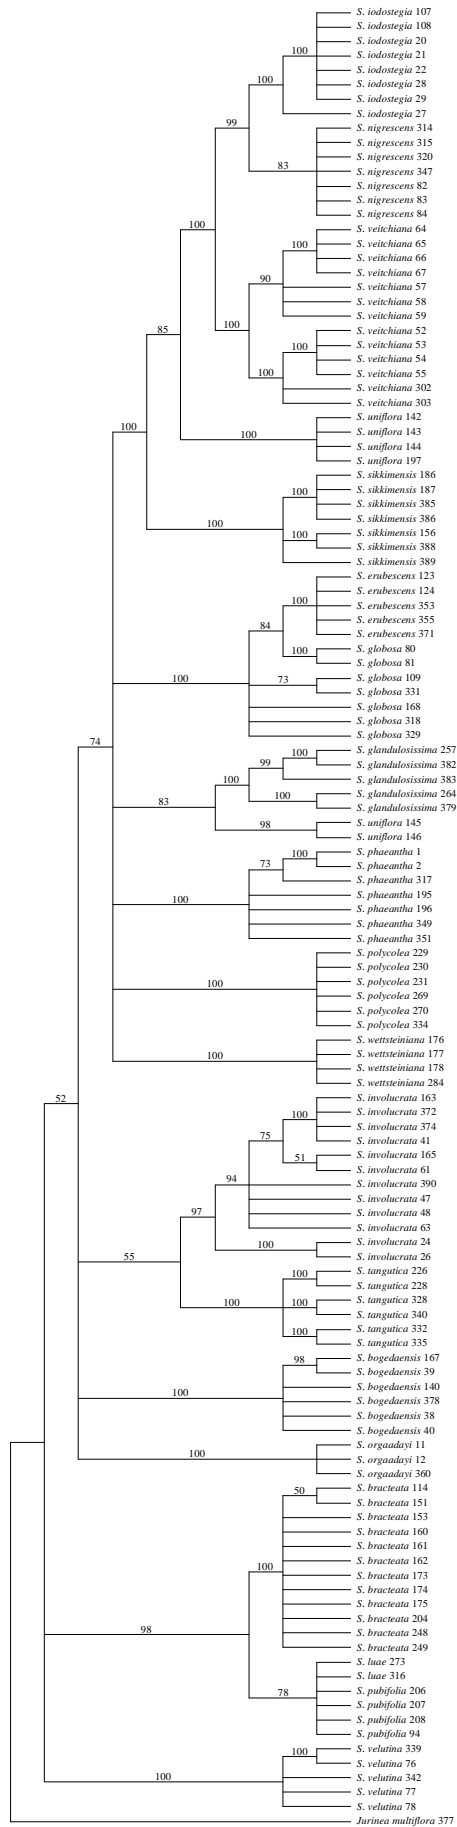

Supplement: Supporting_information.zip [file Supporting_information.zip]

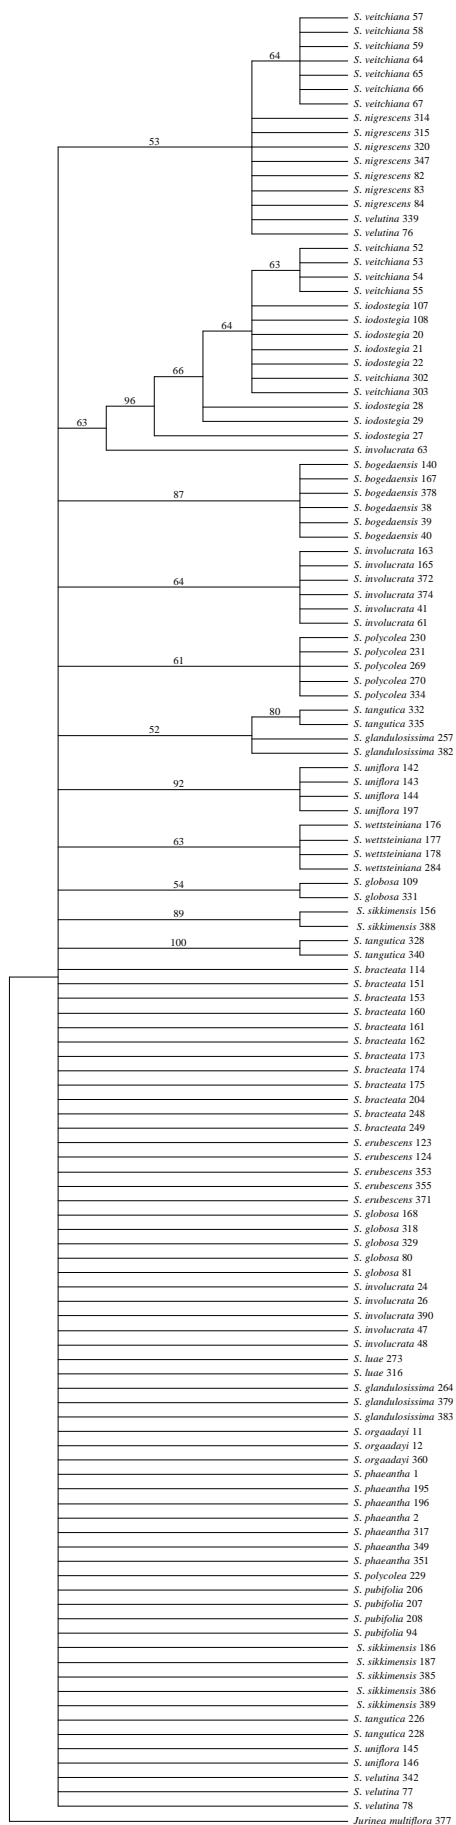

Supplement: Supporting_information.zip [file Supporting_information.zip]

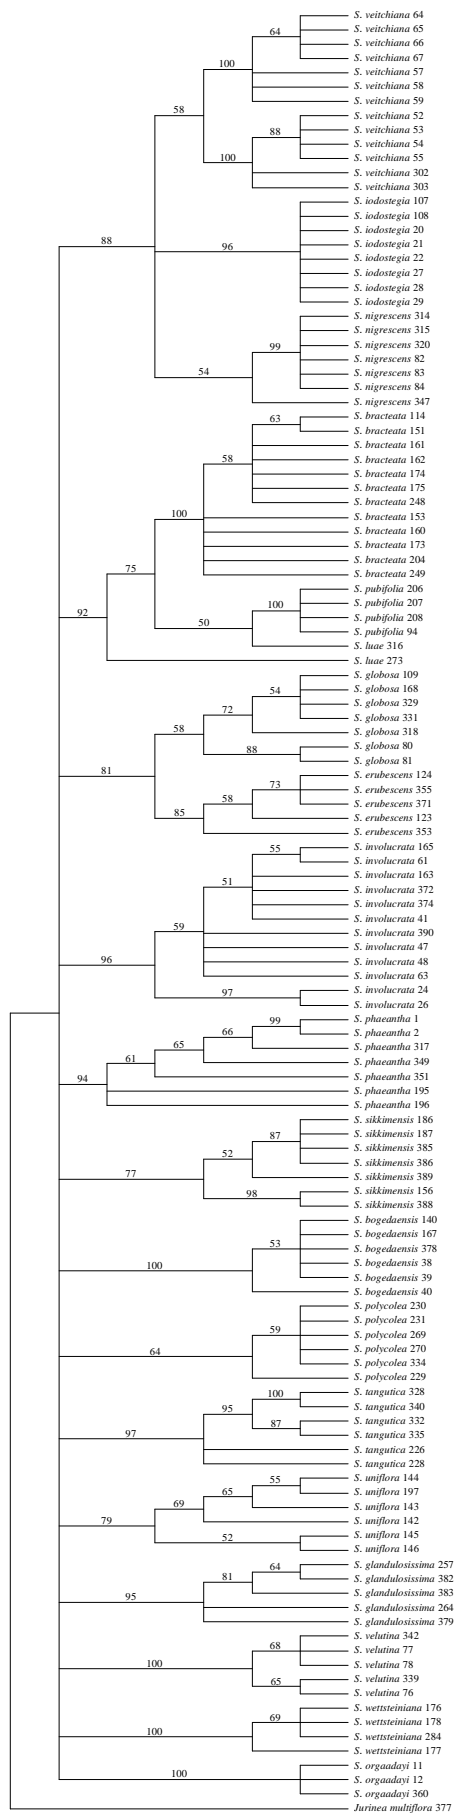

Supplement: Supporting_information.zip [file Supporting_information.zip]

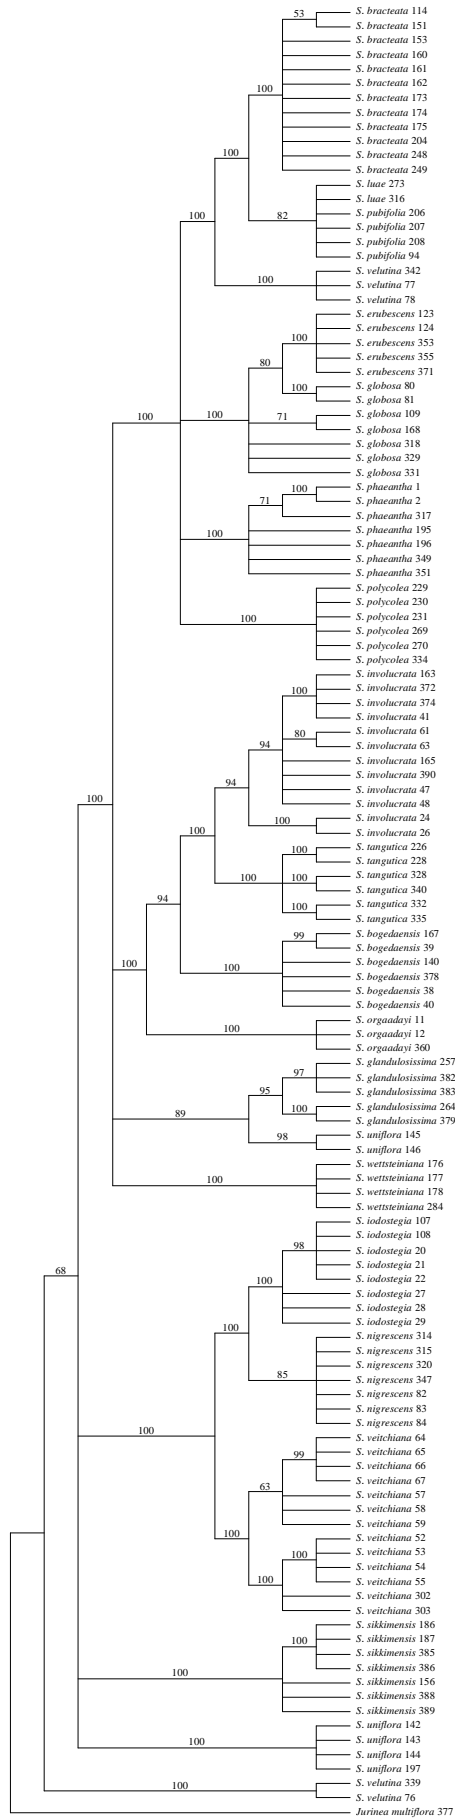

Supplement: Supporting_information.zip [file Supporting_information.zip]

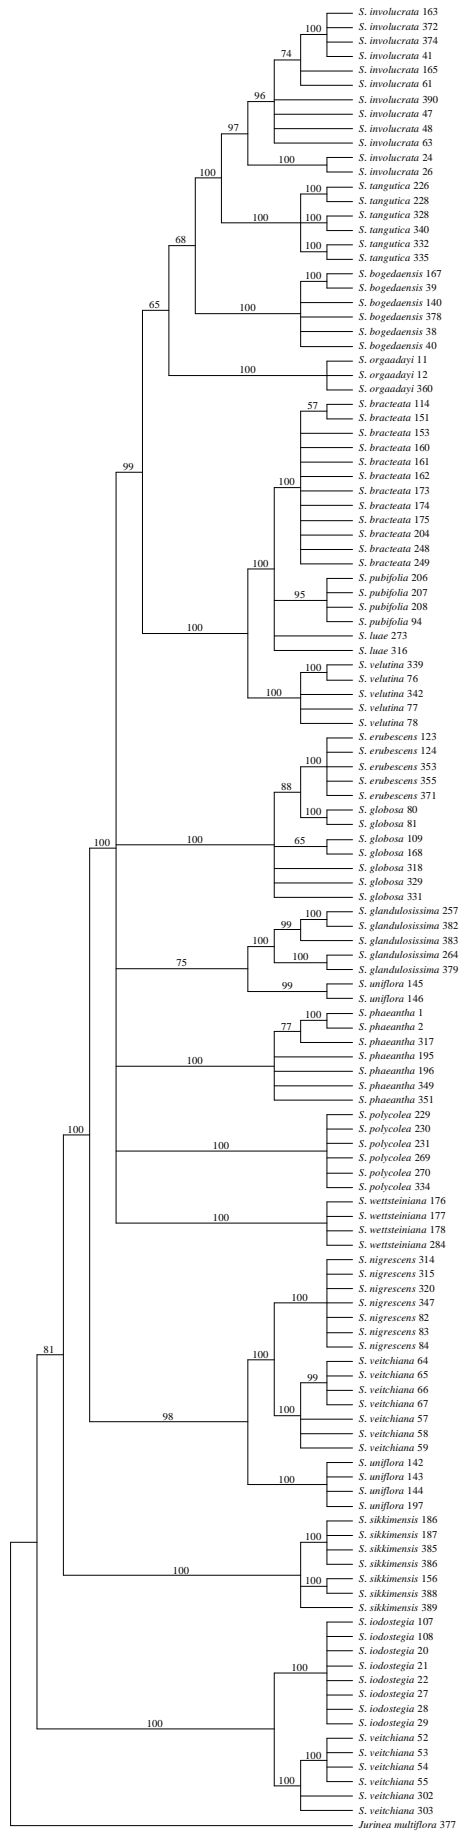

Supplement: Supporting_information.zip [file Supporting_information.zip]

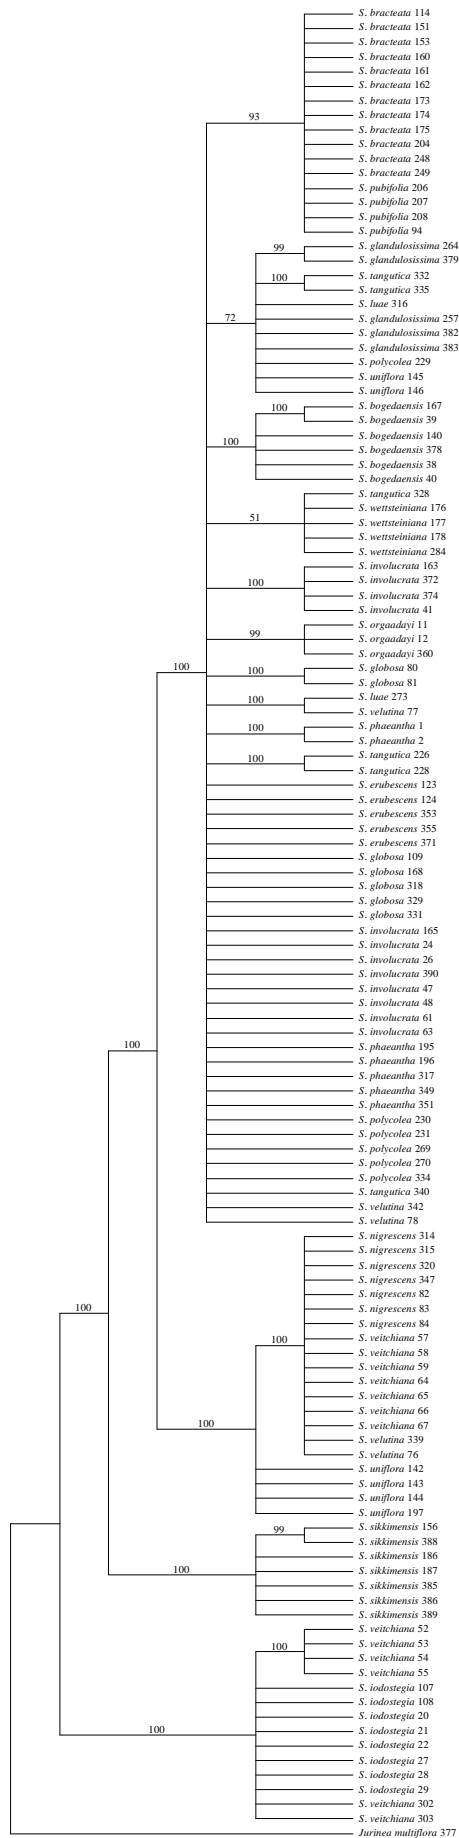

Supplement: Supporting_information.zip [file Supporting_information.zip]

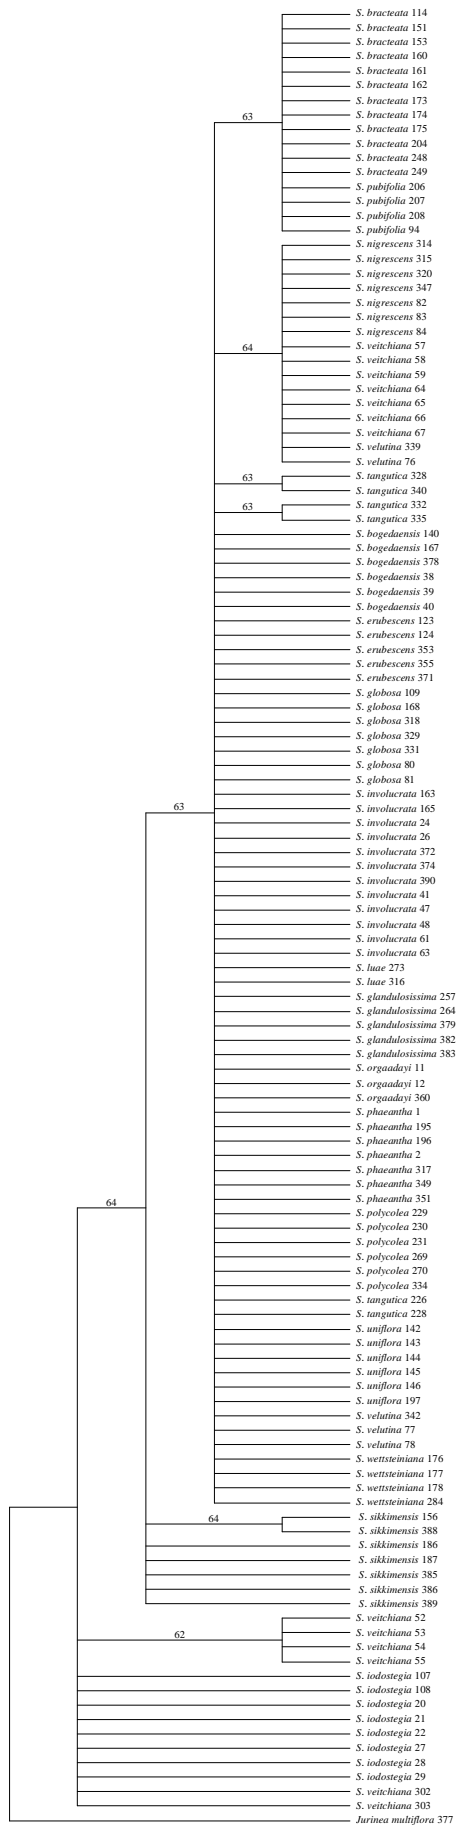

Supplement: Supporting_information.zip [file Supporting_information.zip]

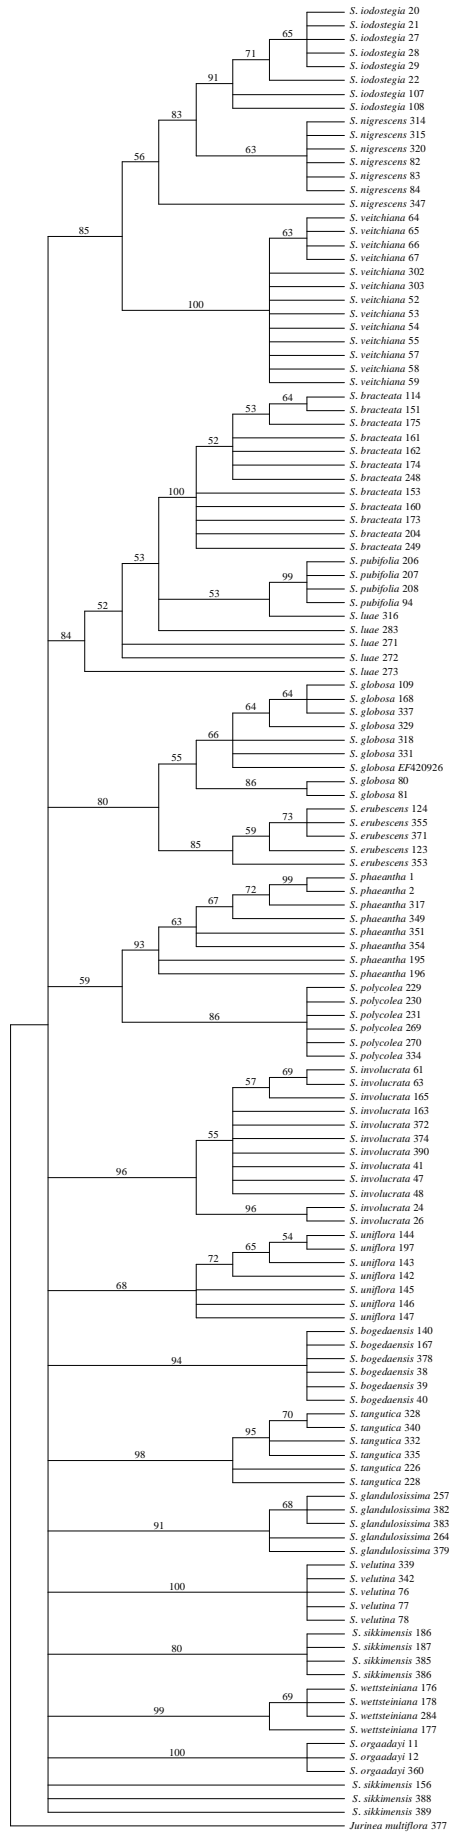

Supplement: Supporting_information.zip [file Supporting_information.zip]

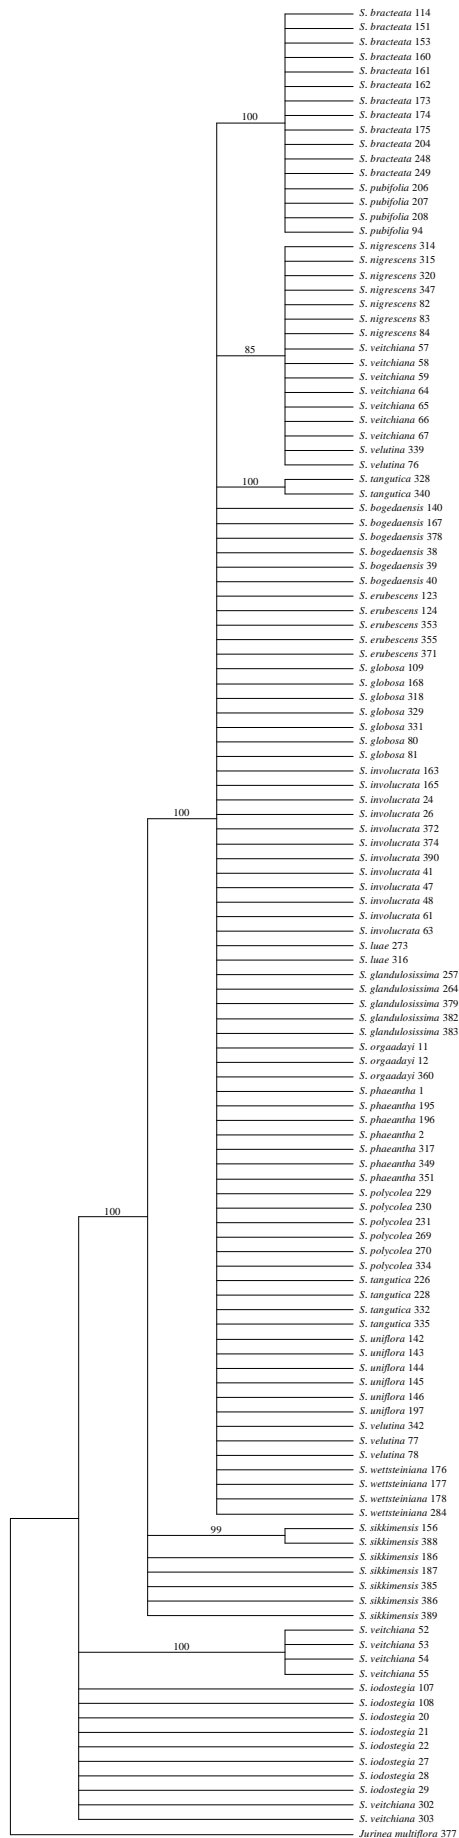

Supplement: Supporting_information.zip [file Supporting_information.zip]

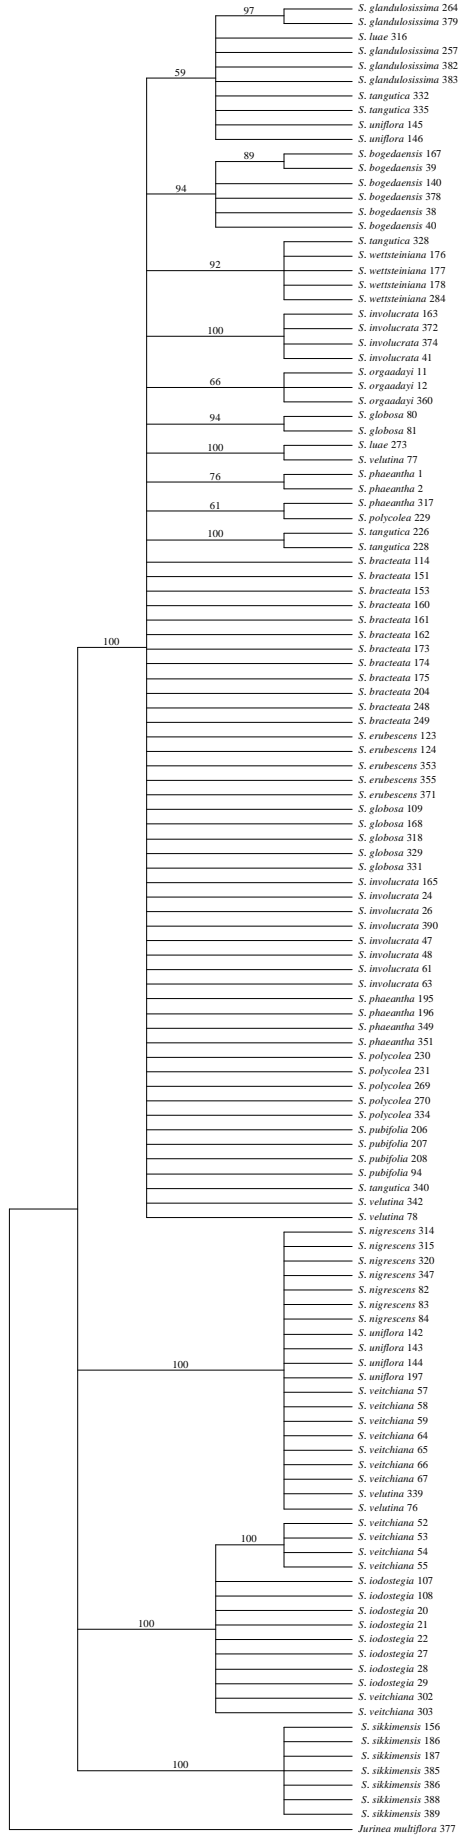

Supplement: Supporting_information.zip [file Supporting_information.zip]

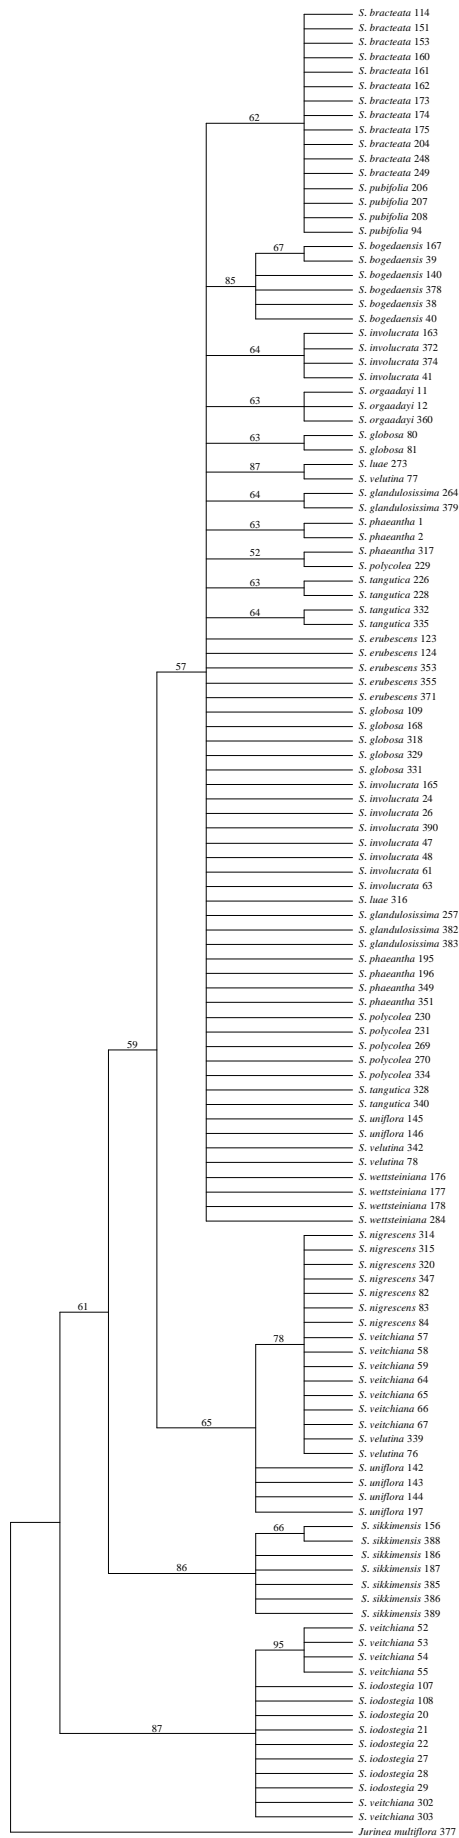

Supplement: Supporting_information.zip [file Supporting_information.zip]

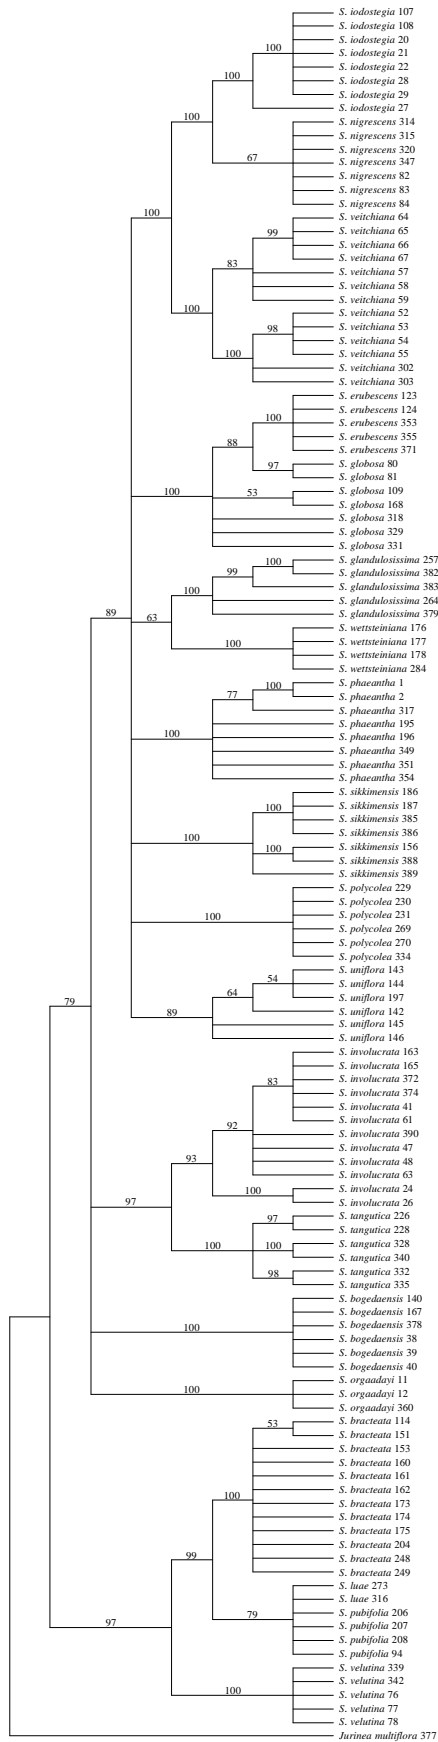

Supplement: Supporting_information.zip [file Supporting_information.zip]

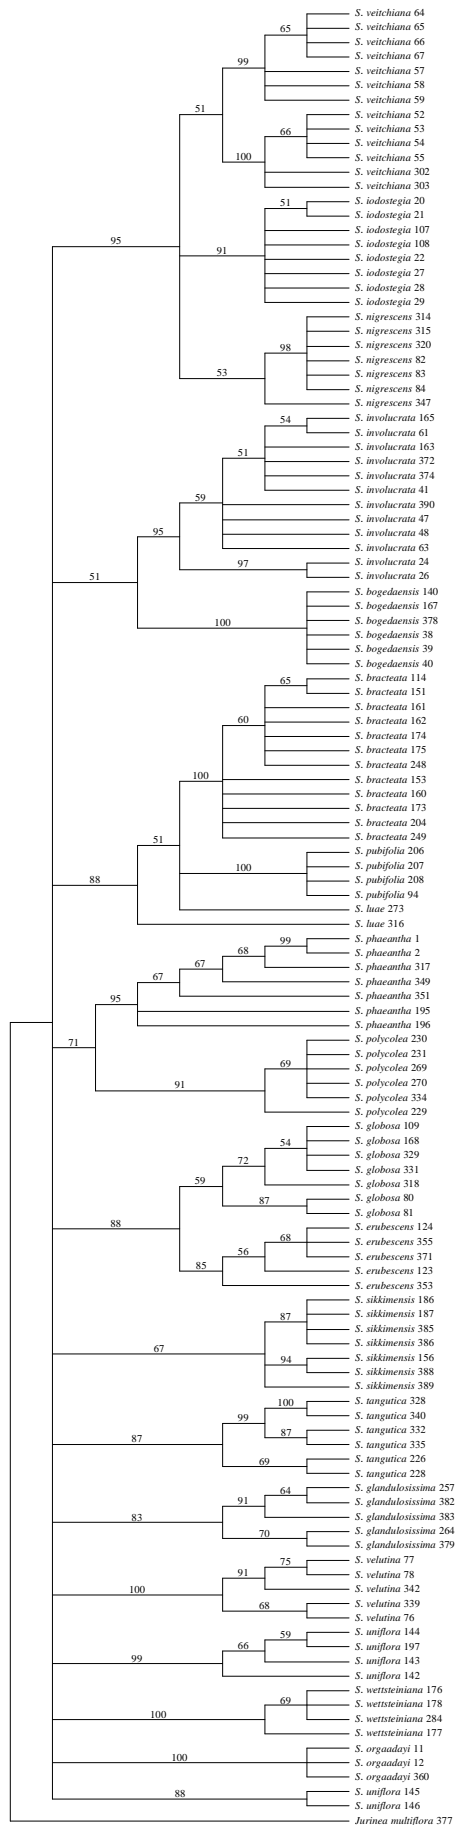

Supplement: Supporting_information.zip [file Supporting_information.zip]

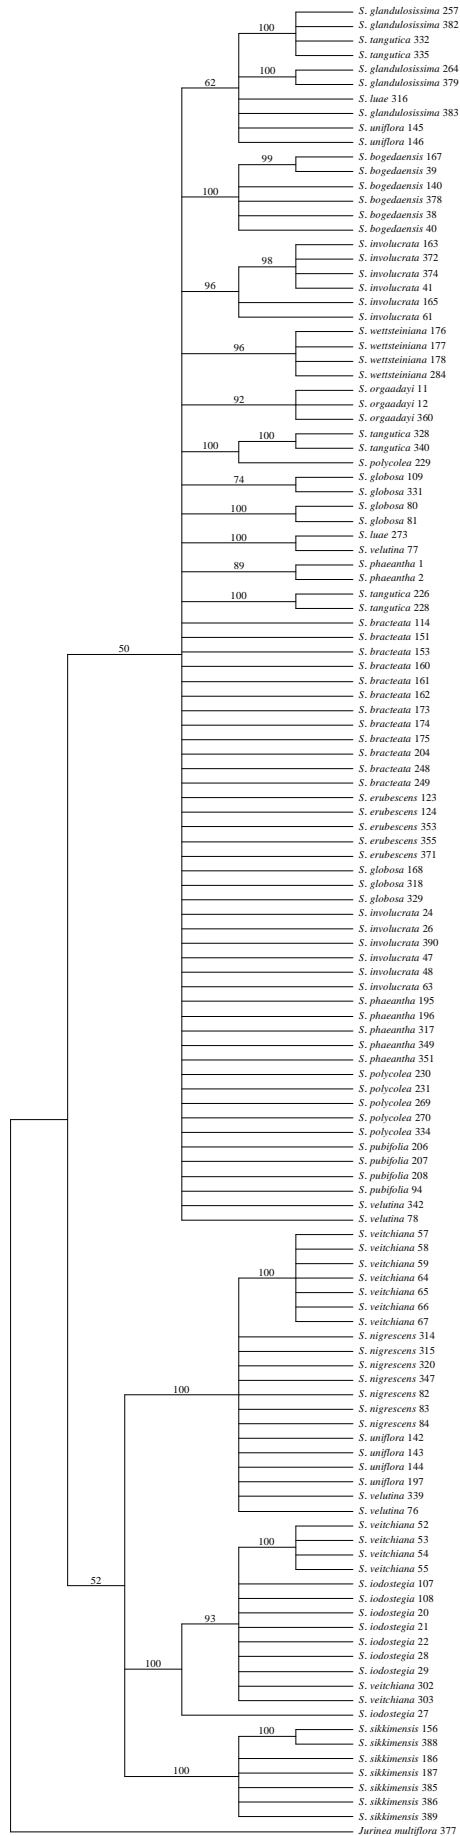

Supplement: Supporting_information.zip [file Supporting_information.zip]

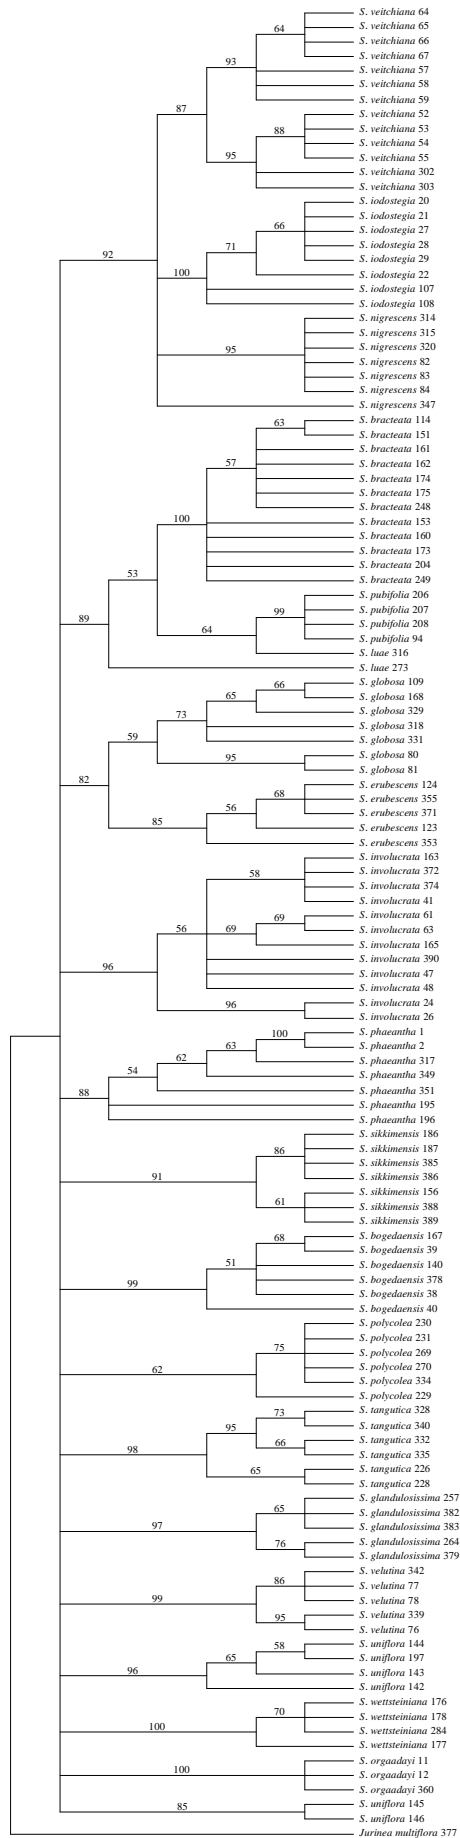

Supplement: Supporting_information.zip [file Supporting_information.zip]

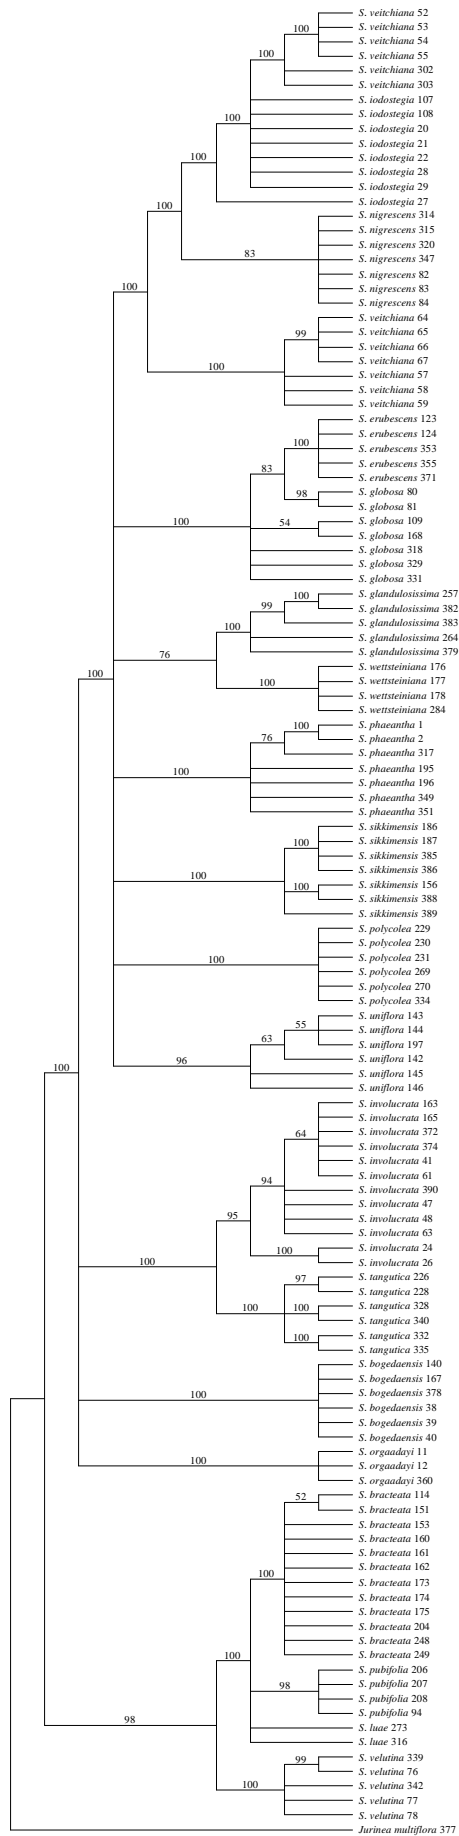

Supplement: Supporting_information.zip [file Supporting_information.zip]

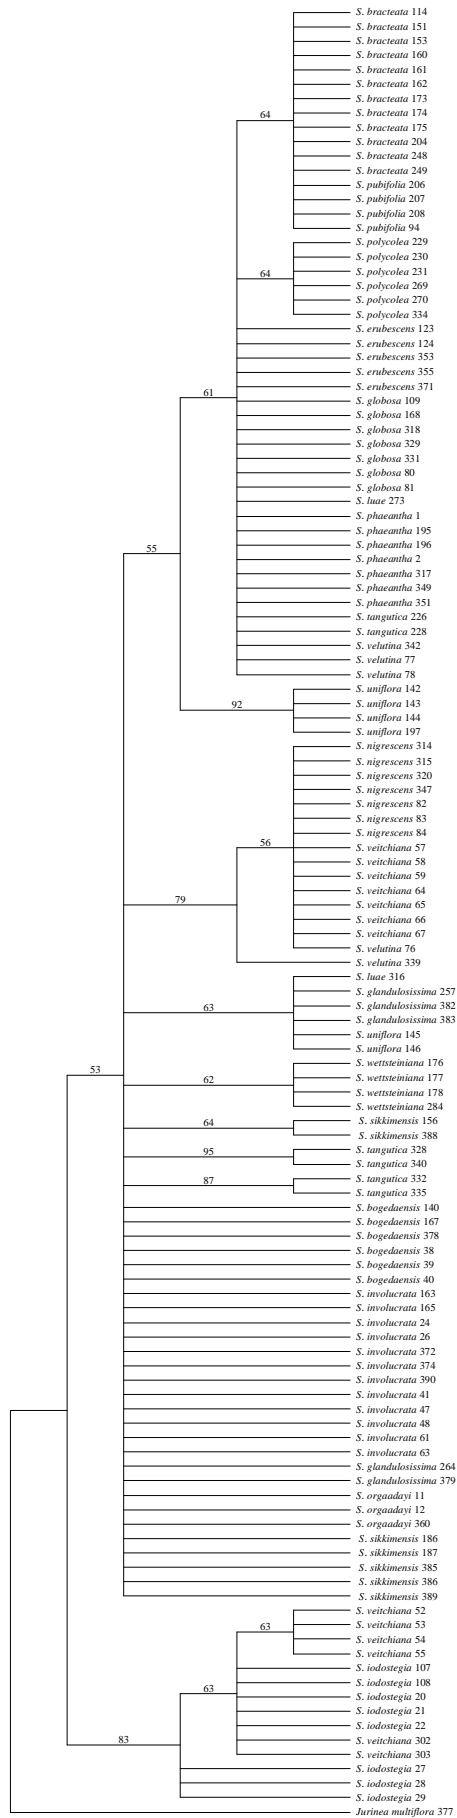

Supplement: Supporting_information.zip [file Supporting_information.zip]

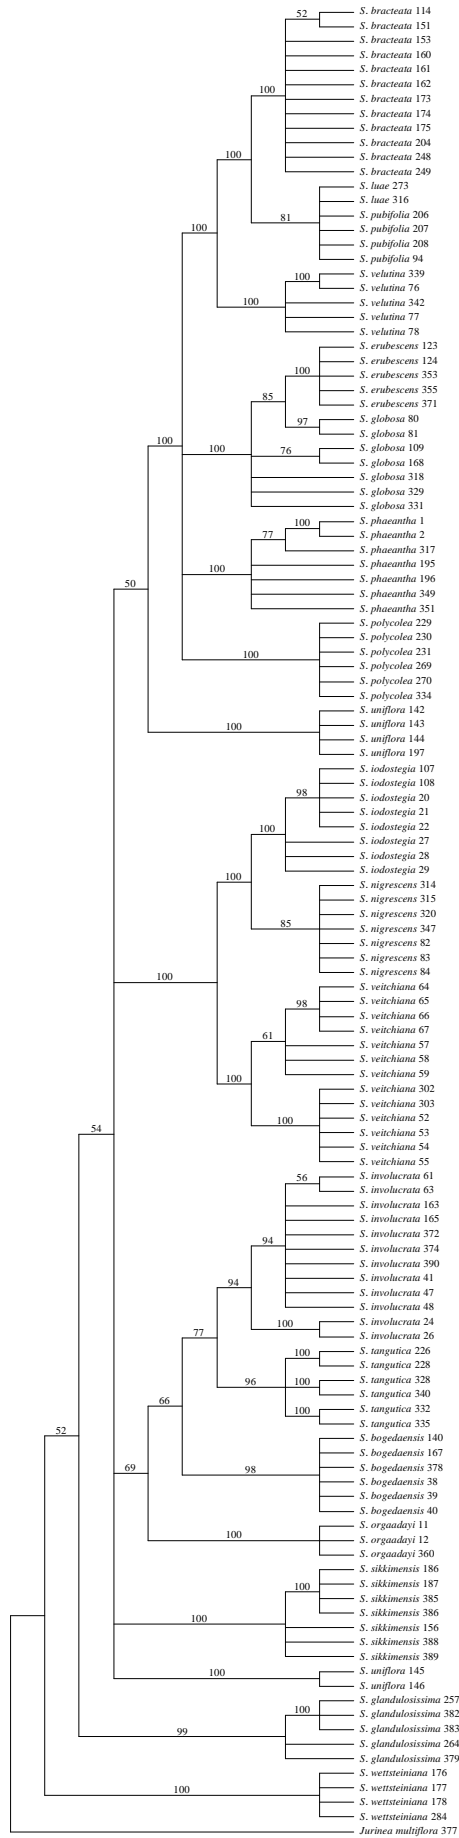

Supplement: Supporting_information.zip [file Supporting_information.zip]

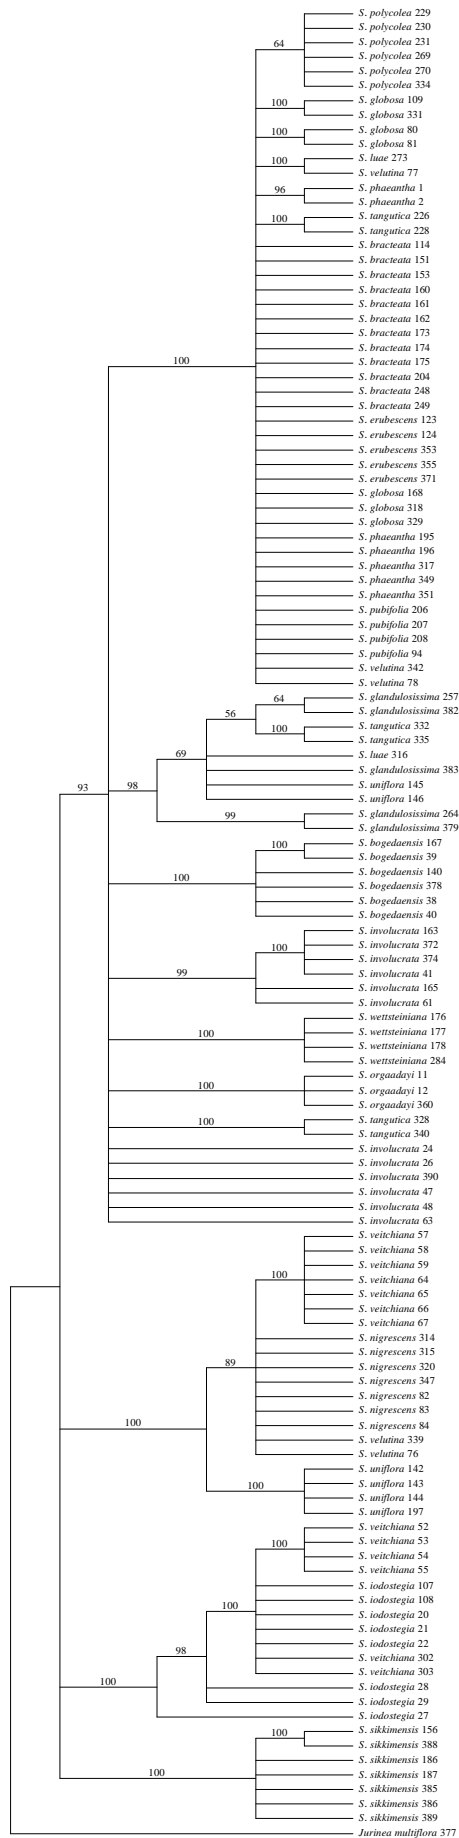

Supplement: Supporting_information.zip [file Supporting_information.zip]

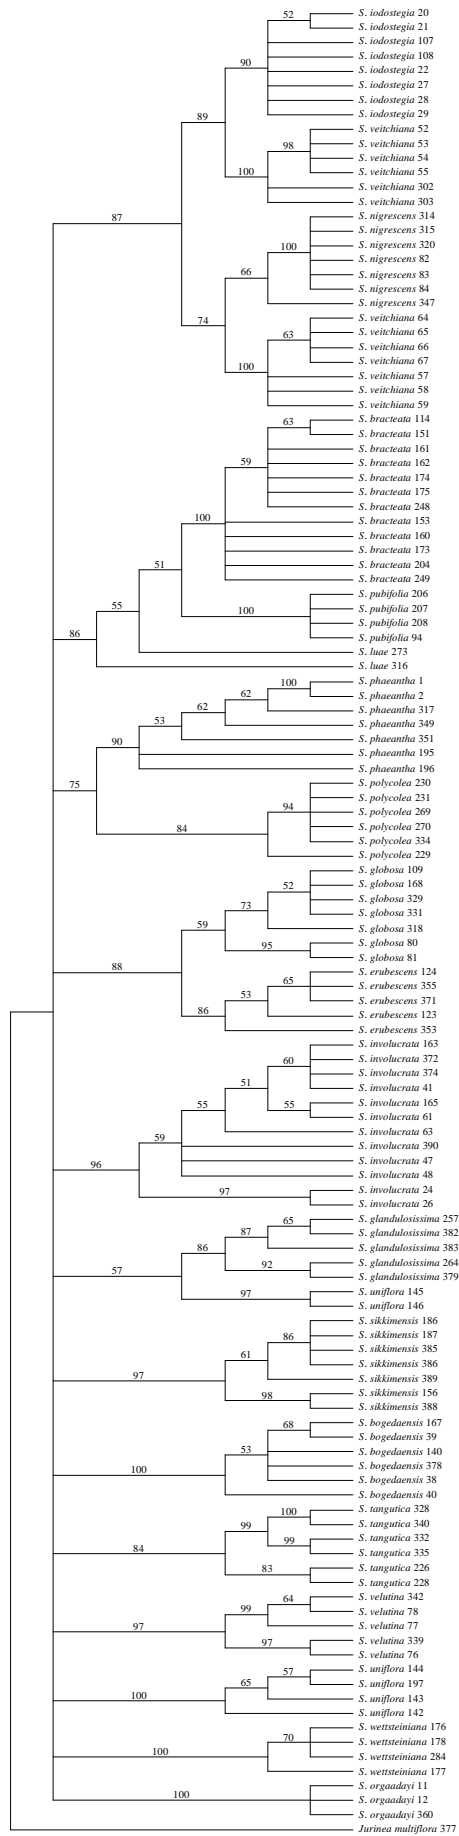

Supplement: Supporting_information.zip [file Supporting_information.zip]

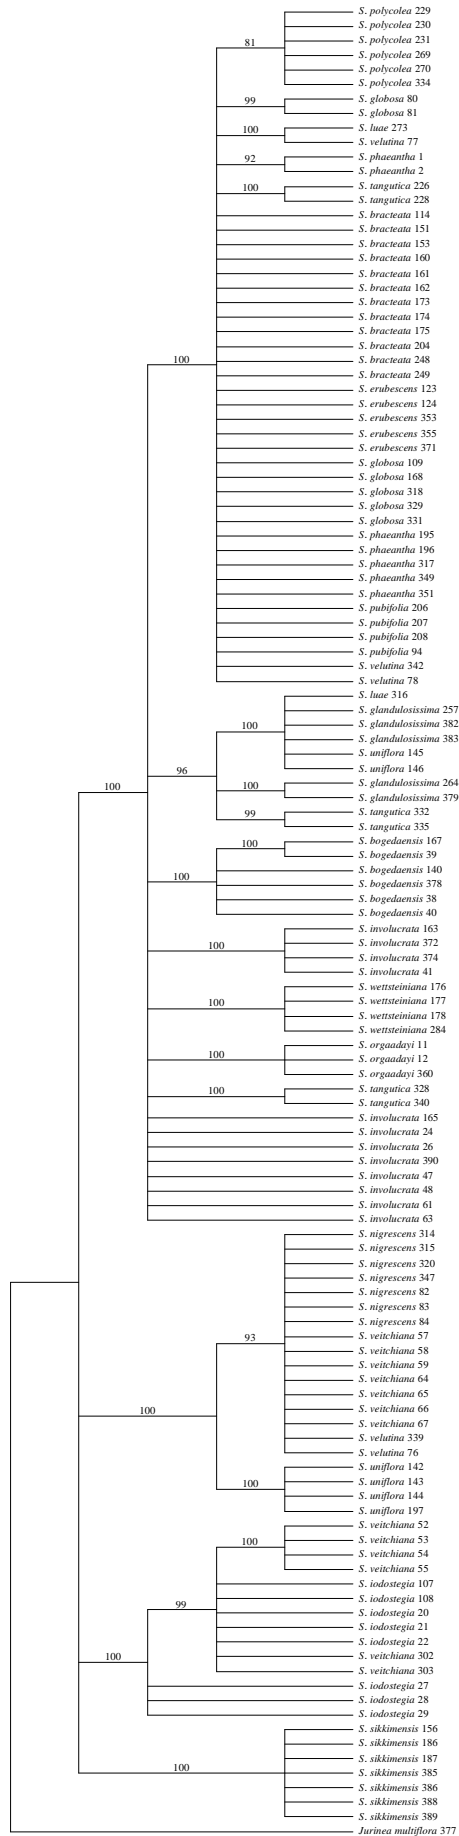

Supplement: Supporting_information.zip [file Supporting_information.zip]

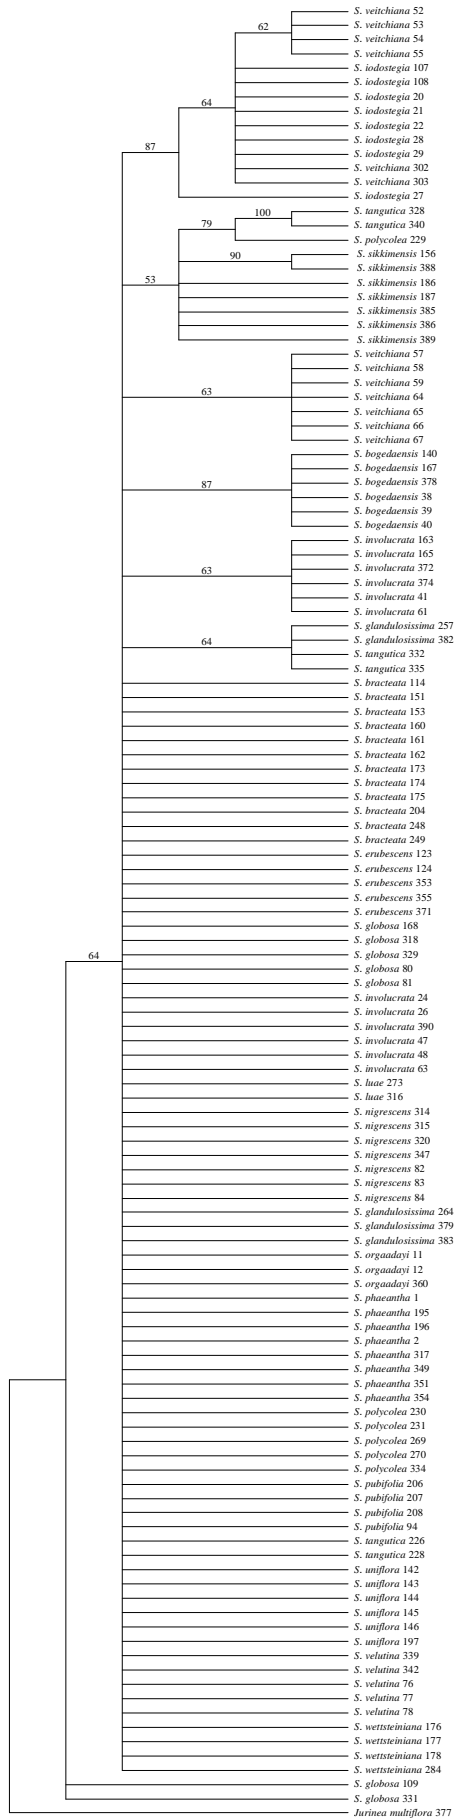

Supplement: Supporting_information.zip [file Supporting_information.zip]

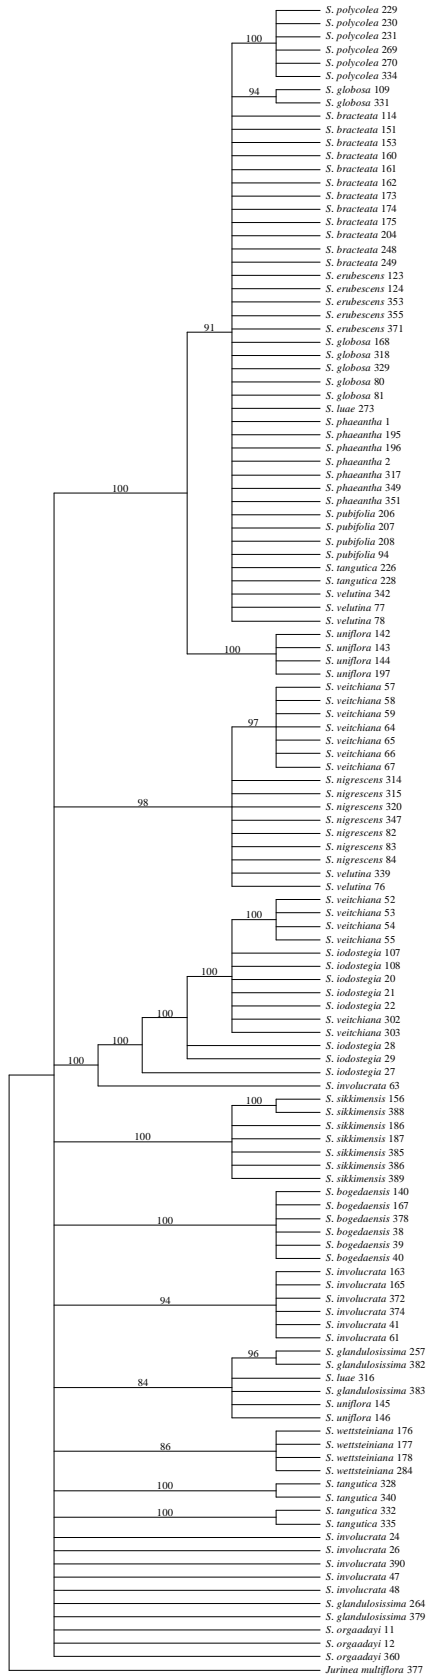

Supplement: Supporting_information.zip [file Supporting_information.zip]

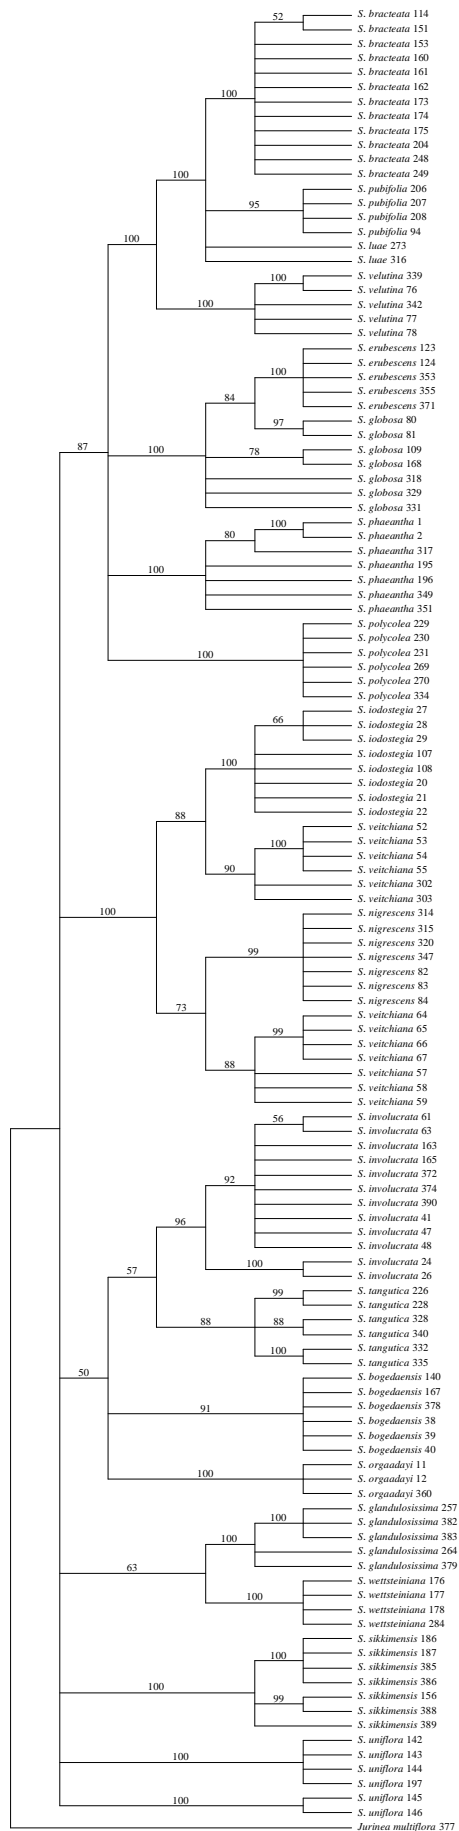

Supplement: Supporting_information.zip [file Supporting_information.zip]

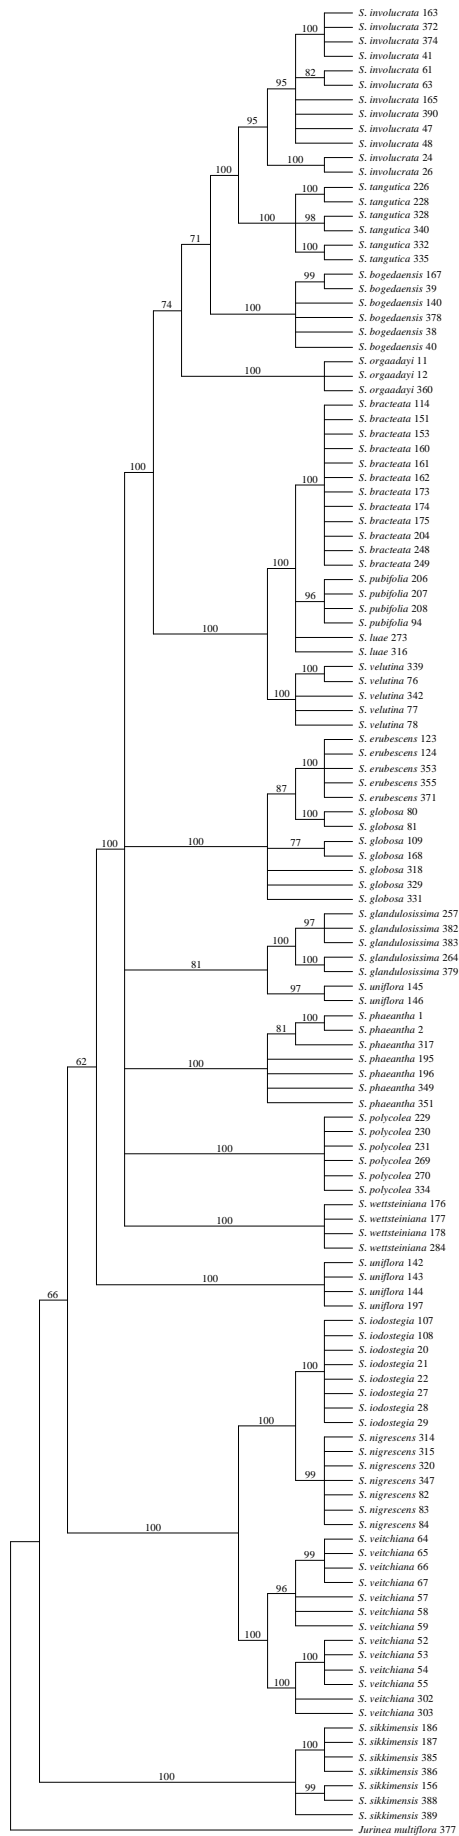

Supplement: Supporting_information.zip [file Supporting_information.zip]

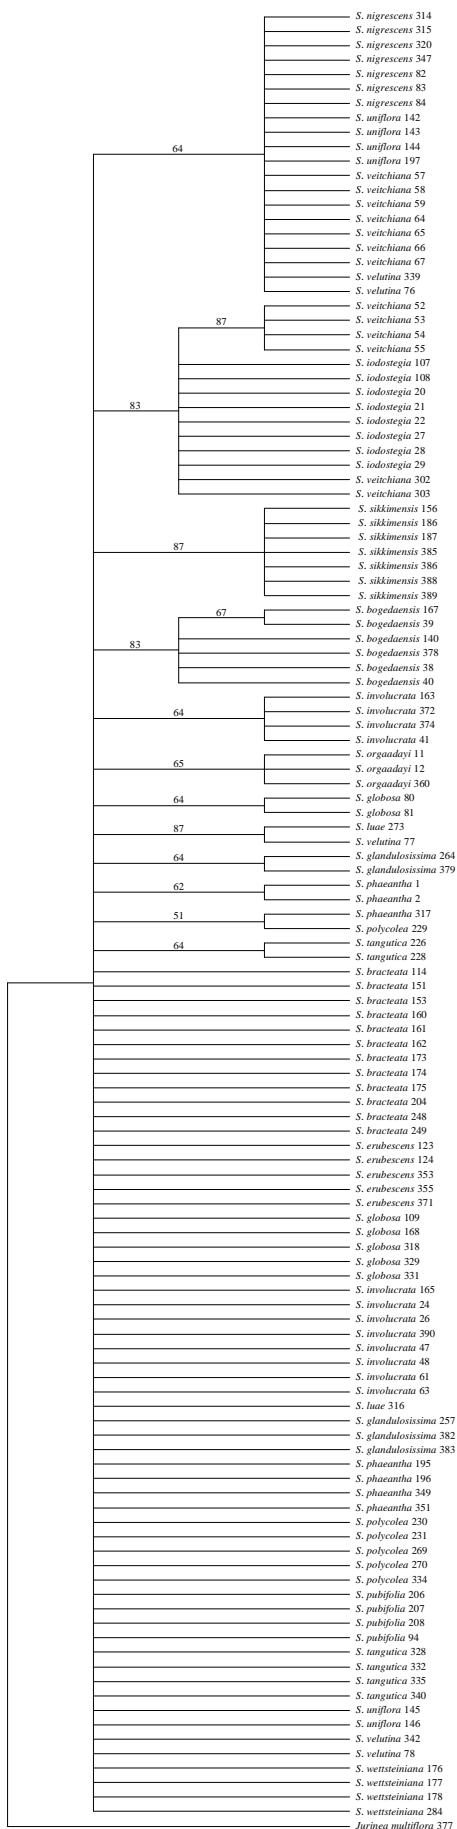

Supplement: Supporting_information.zip [file Supporting_information.zip]

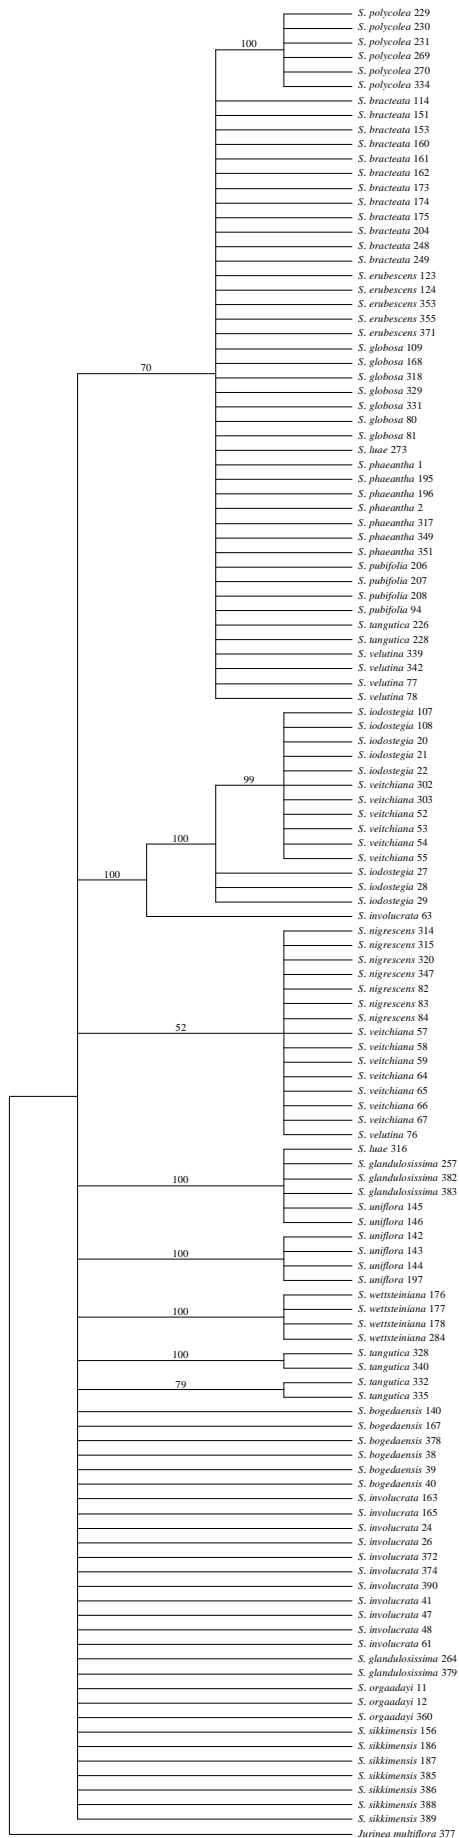

Supplement: Supporting_information.zip [file Supporting_information.zip]

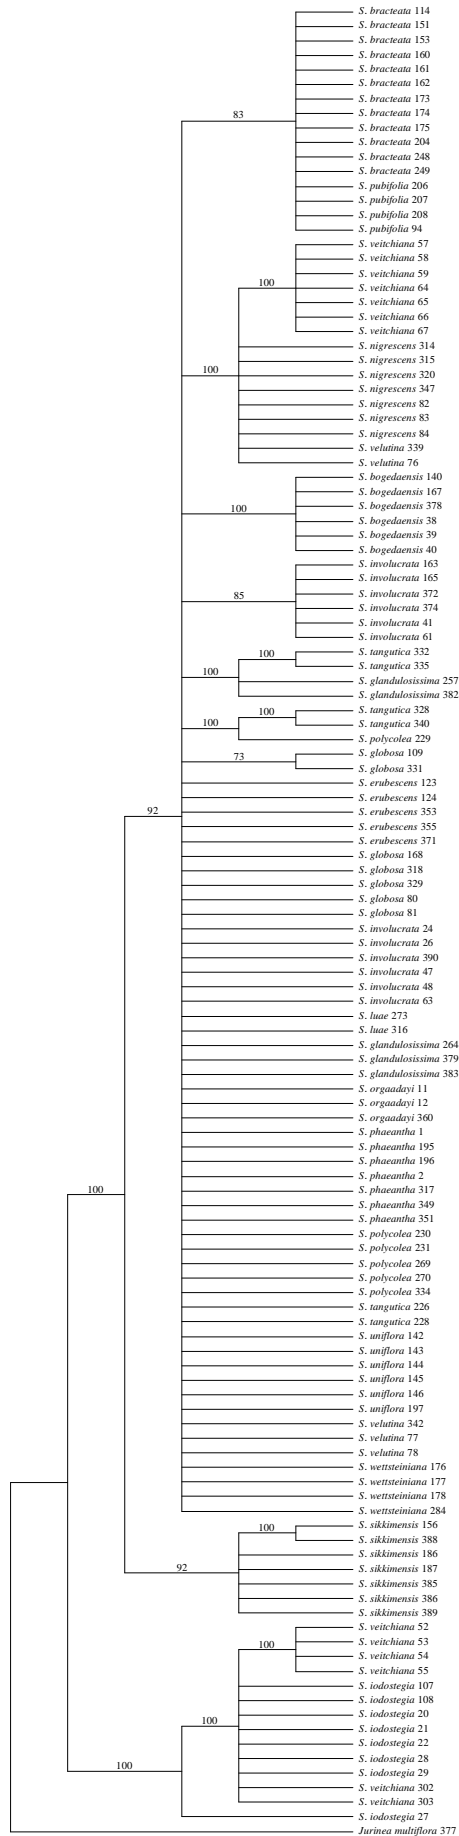

Supplement: Supporting_information.zip [file Supporting_information.zip]

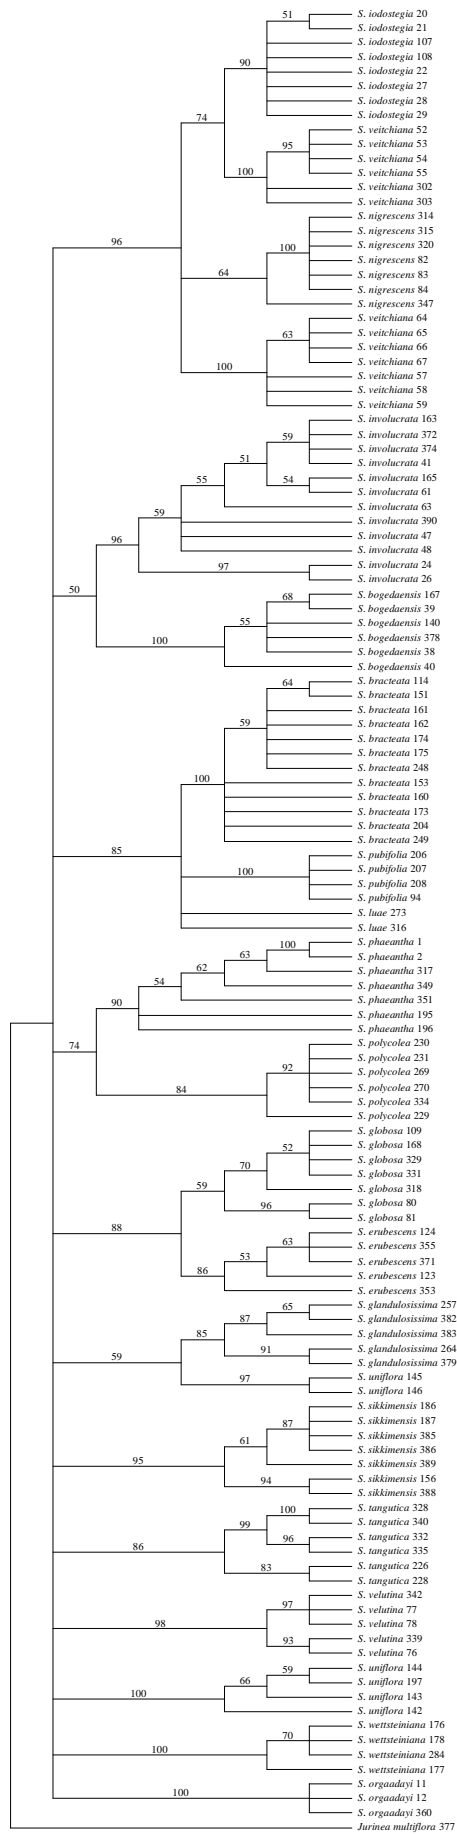

Supplement: Supporting_information.zip [file Supporting_information.zip]

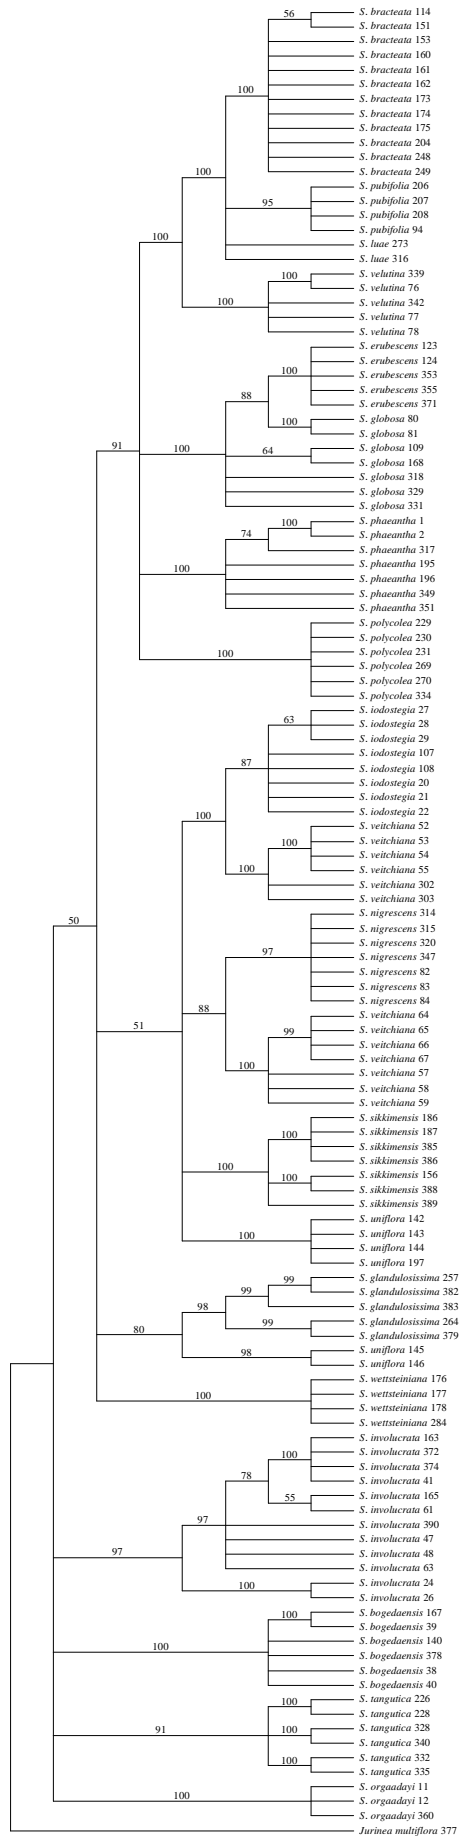

Supplement: Supporting_information.zip [file Supporting_information.zip]

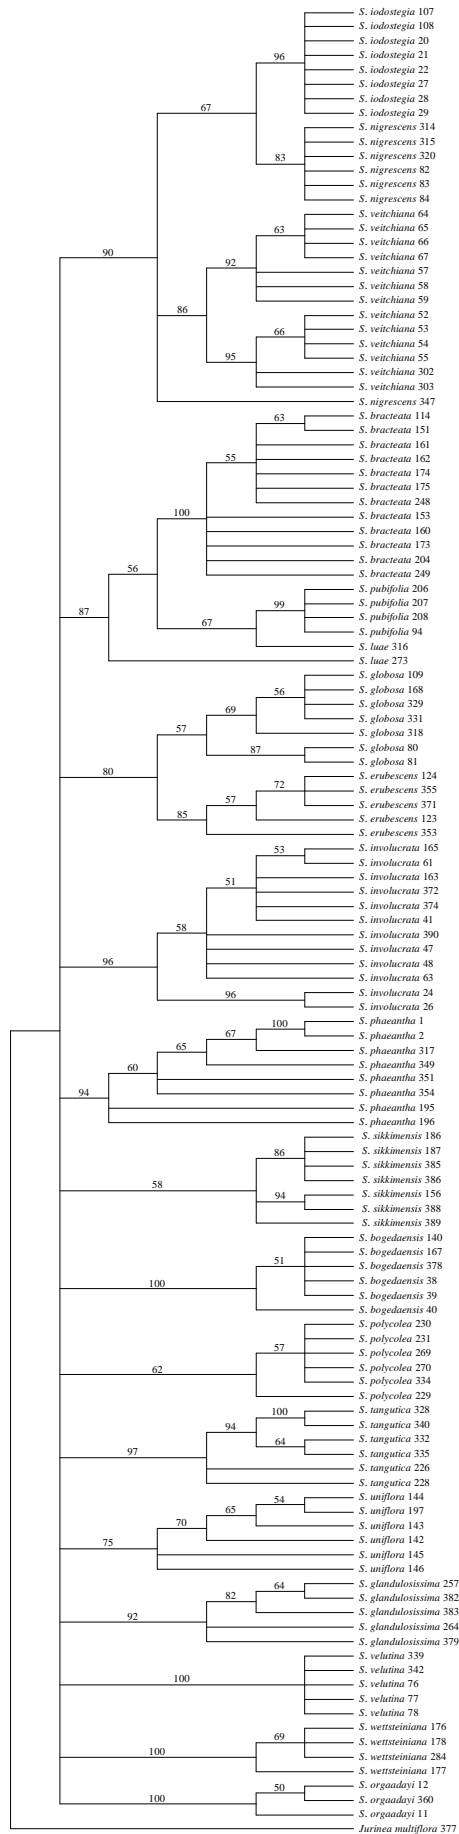

Supplement: Supporting_information.zip [file Supporting_information.zip]

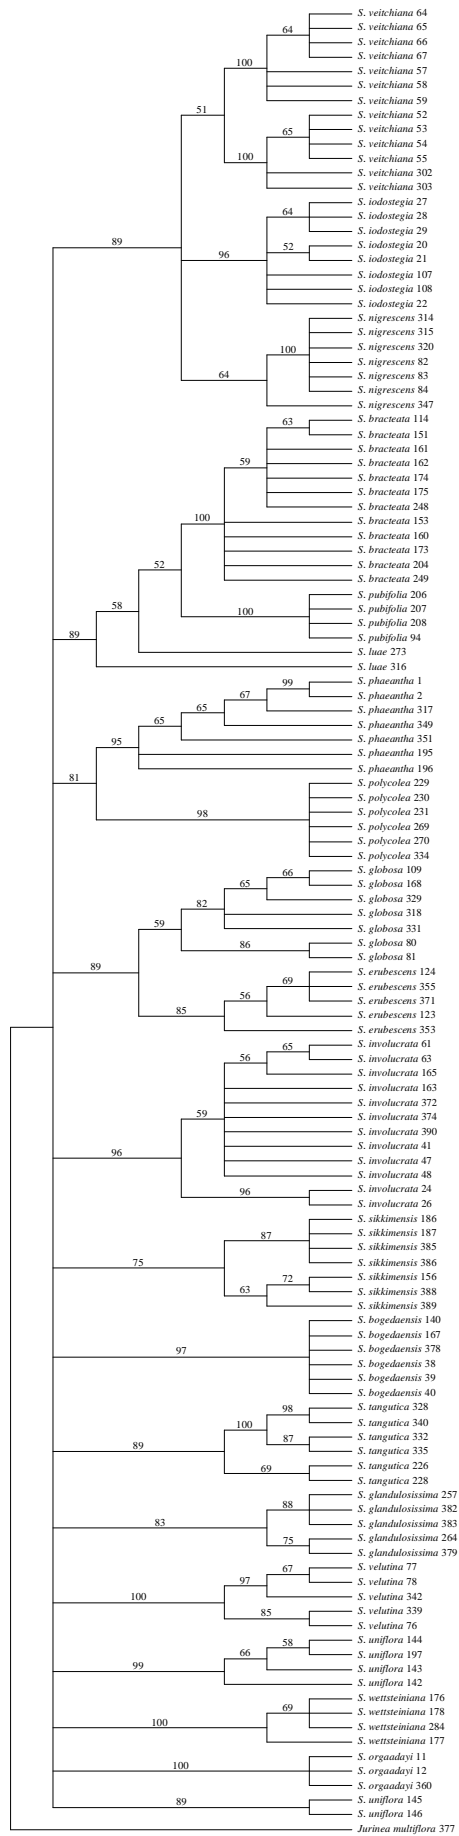

Supplement: Supporting_information.zip [file Supporting_information.zip]

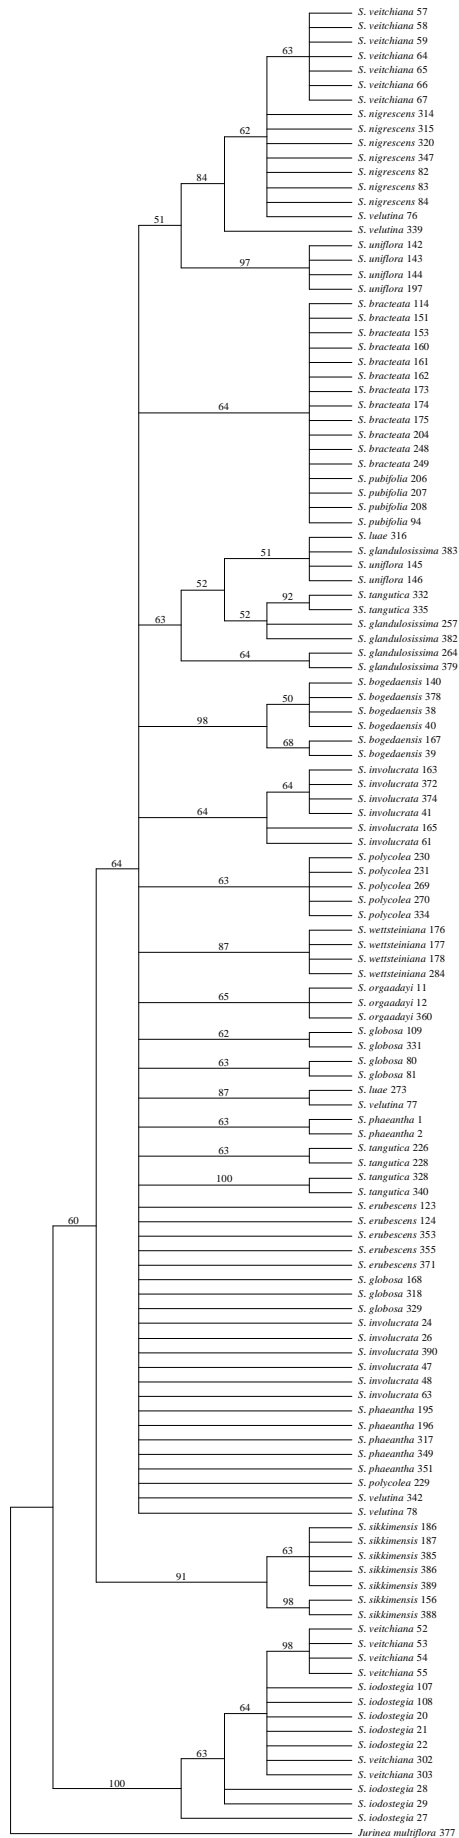

Supplement: Supporting_information.zip [file Supporting_information.zip]

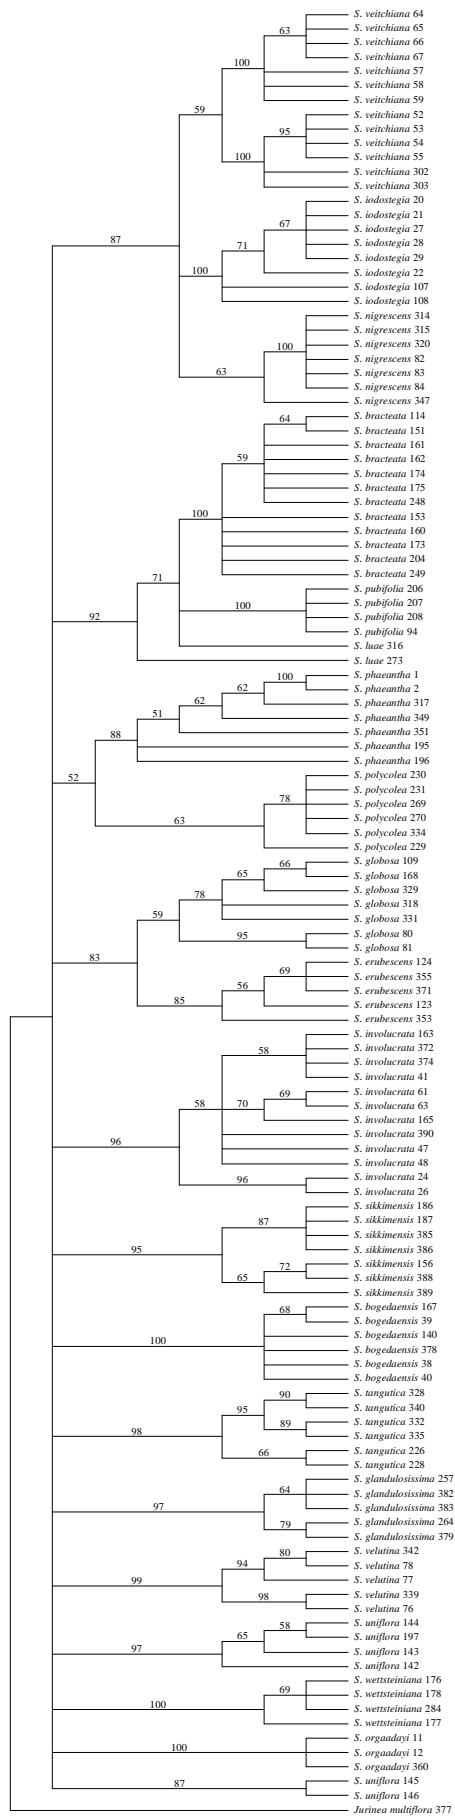

Supplement: Supporting_information.zip [file Supporting_information.zip]

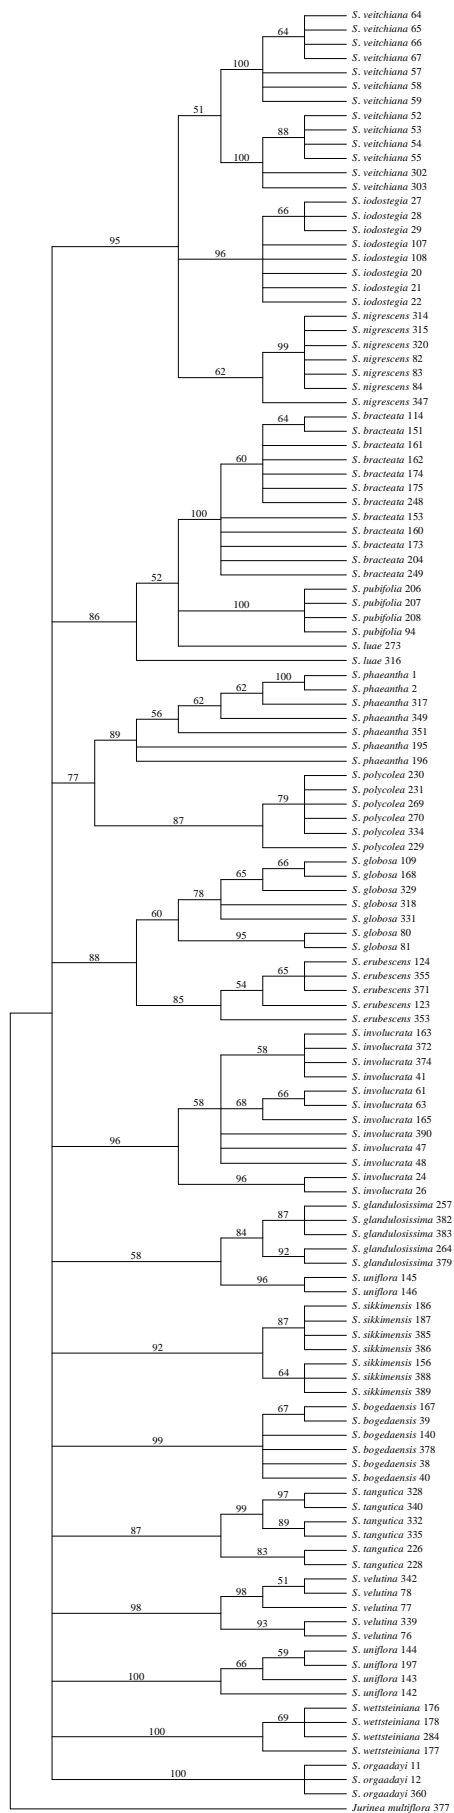

Supplement: Supporting_information.zip [file Supporting_information.zip]

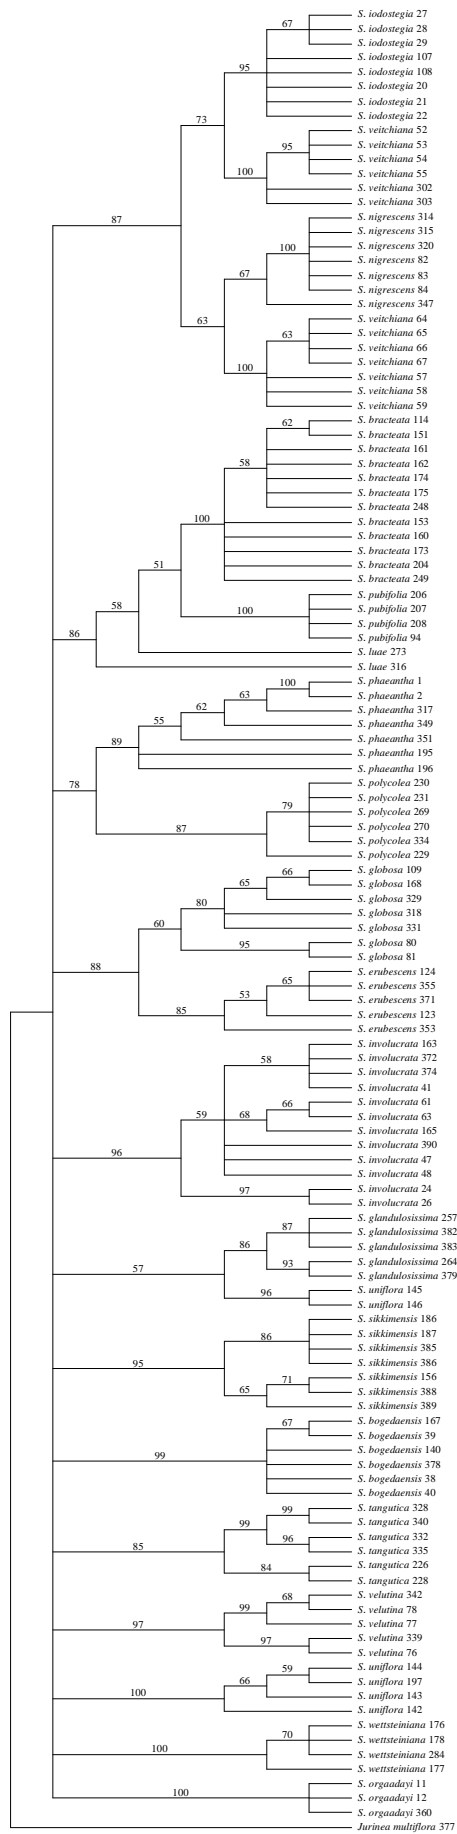

Supplement: Supporting_information.zip [file Supporting_information.zip]

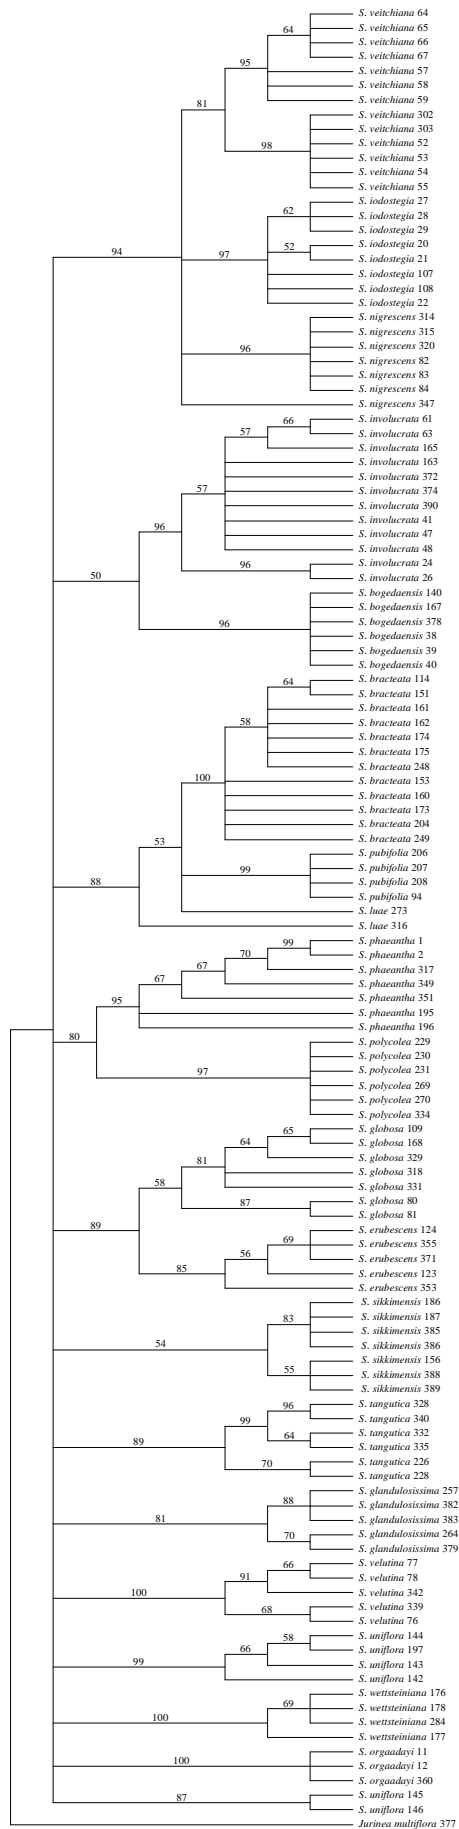

Supplement: Supporting_information.zip [file Supporting_information.zip]

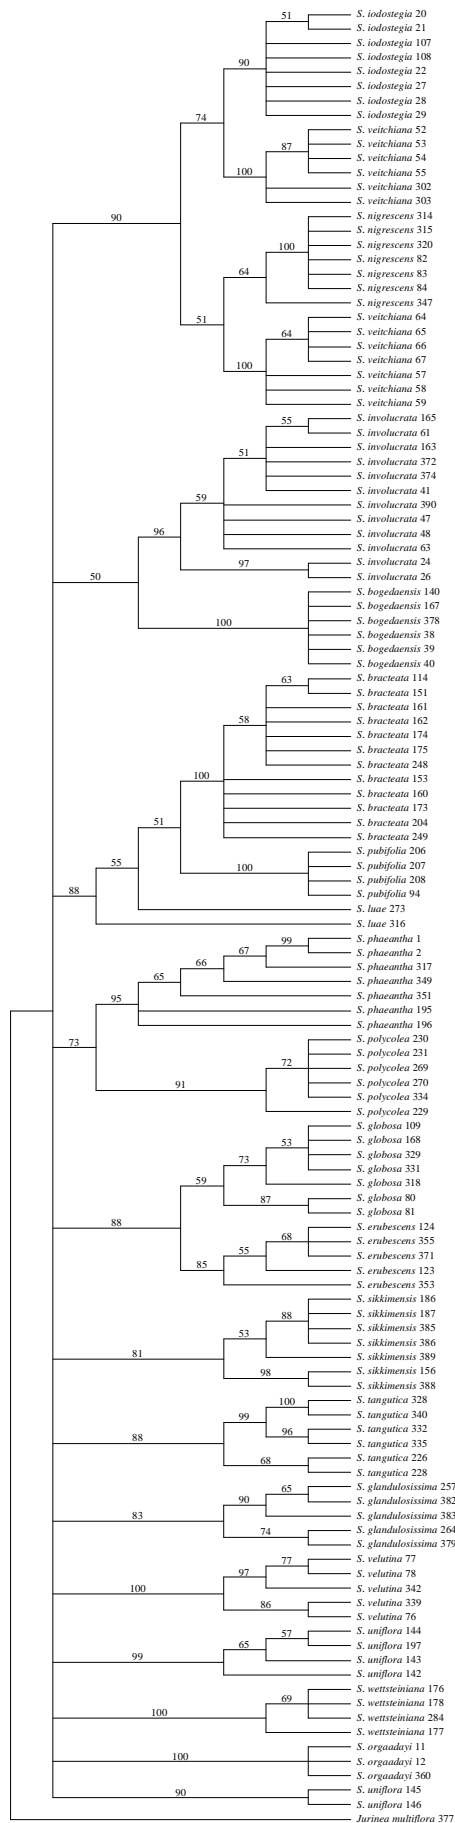

Supplement: Supporting_information.zip [file Supporting_information.zip]

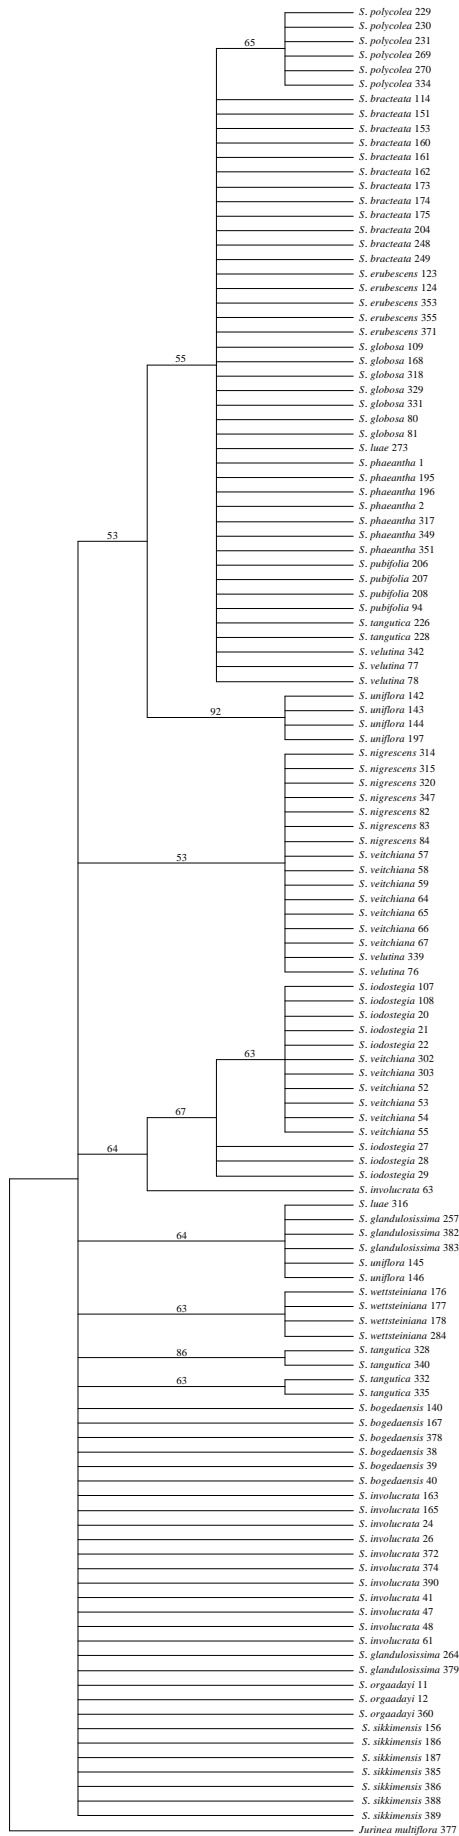

Supplement: Supporting_information.zip [file Supporting_information.zip]

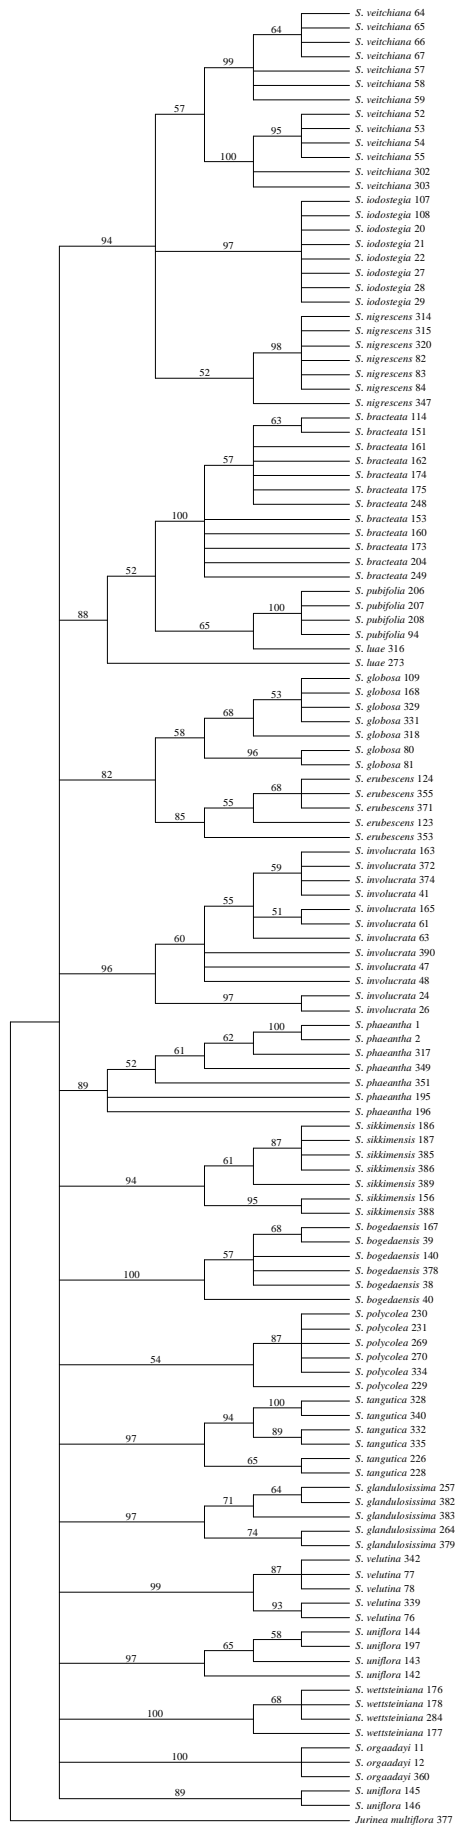

Supplement: Supporting_information.zip [file Supporting_information.zip]

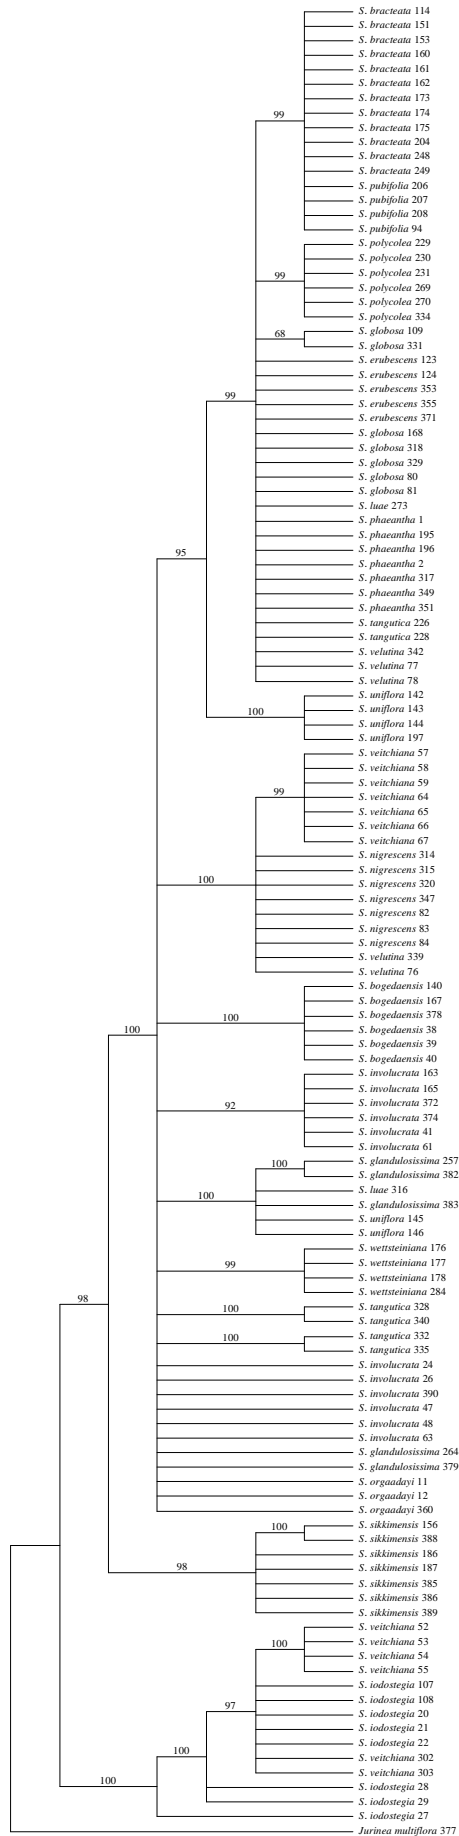

Supplement: Supporting_information.zip [file Supporting_information.zip]

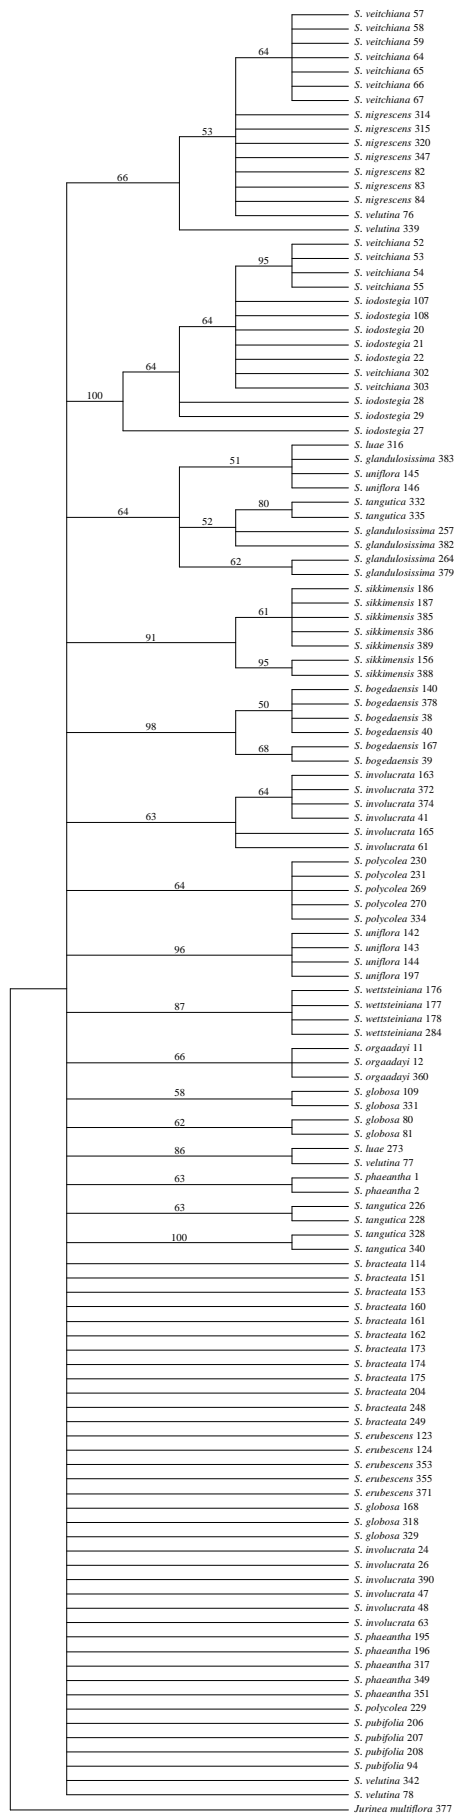

Supplement: Supporting_information.zip [file Supporting_information.zip]

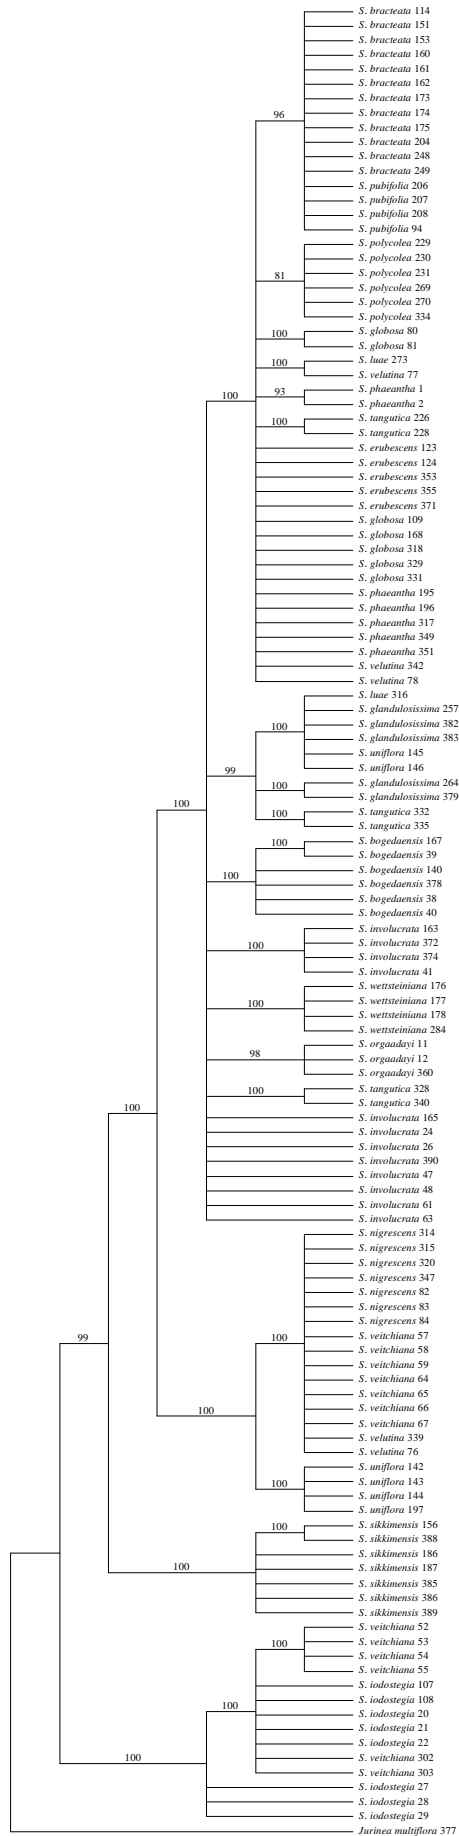

Supplement: Supporting_information.zip [file Supporting_information.zip]

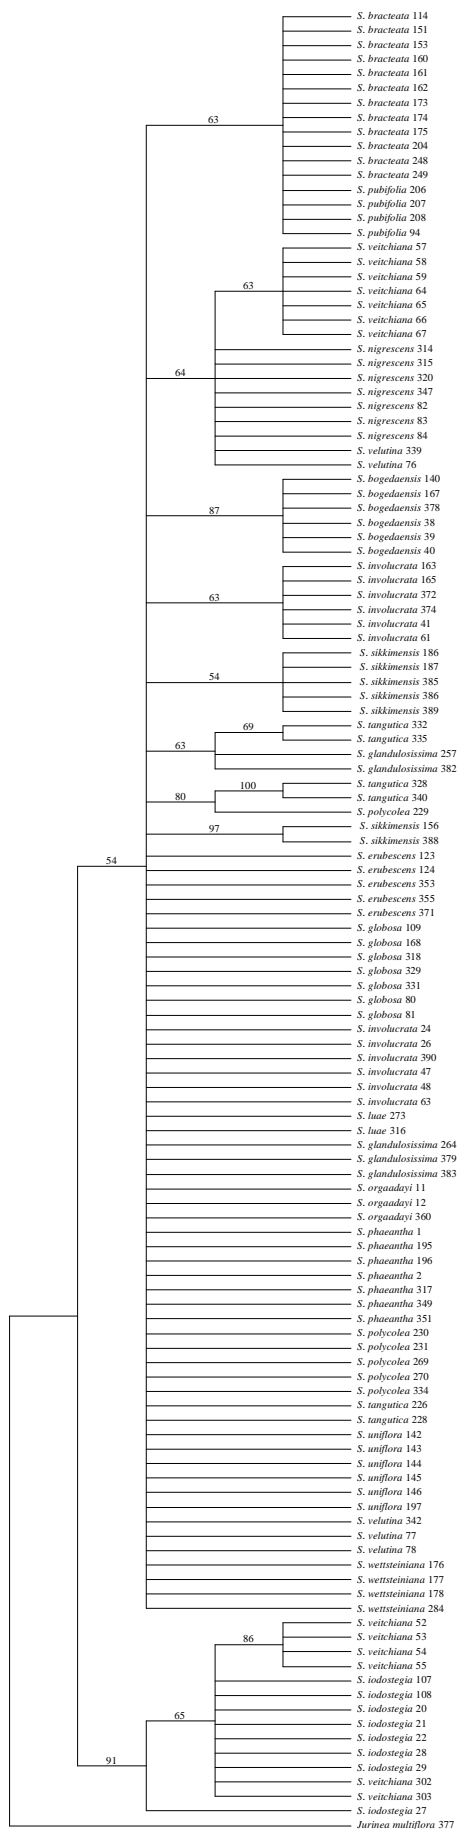

Supplement: Supporting_information.zip [file Supporting_information.zip]

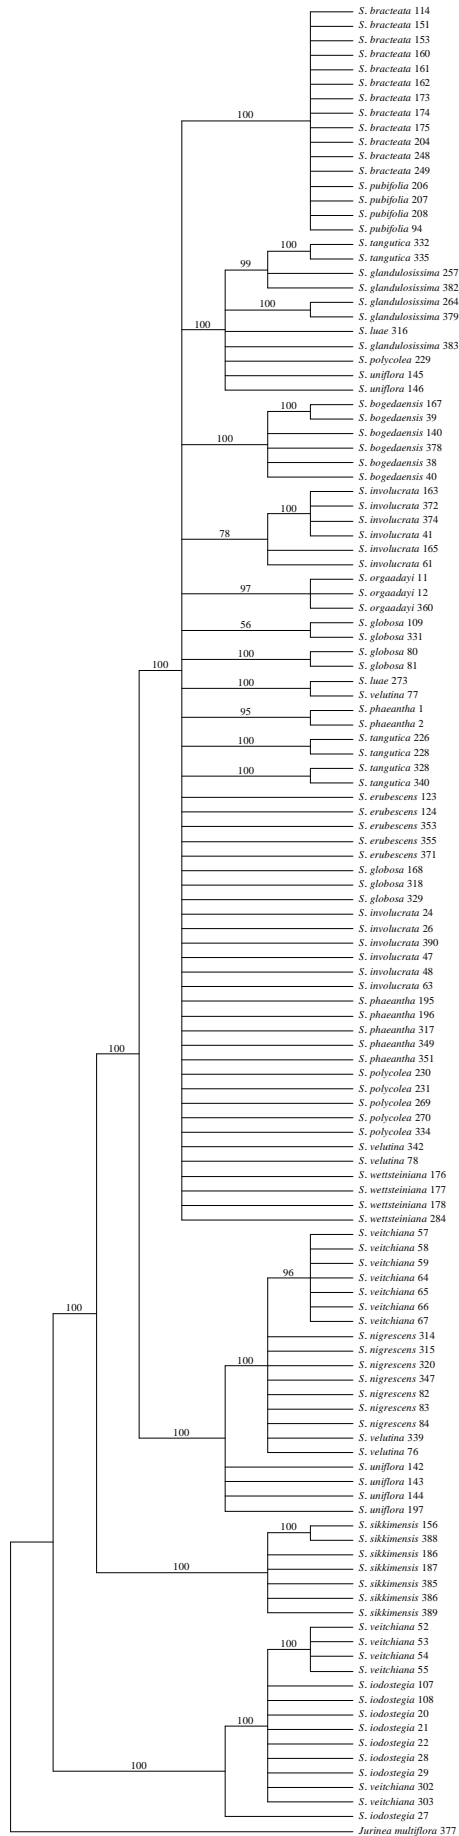

Supplement: Supporting_information.zip [file Supporting_information.zip]

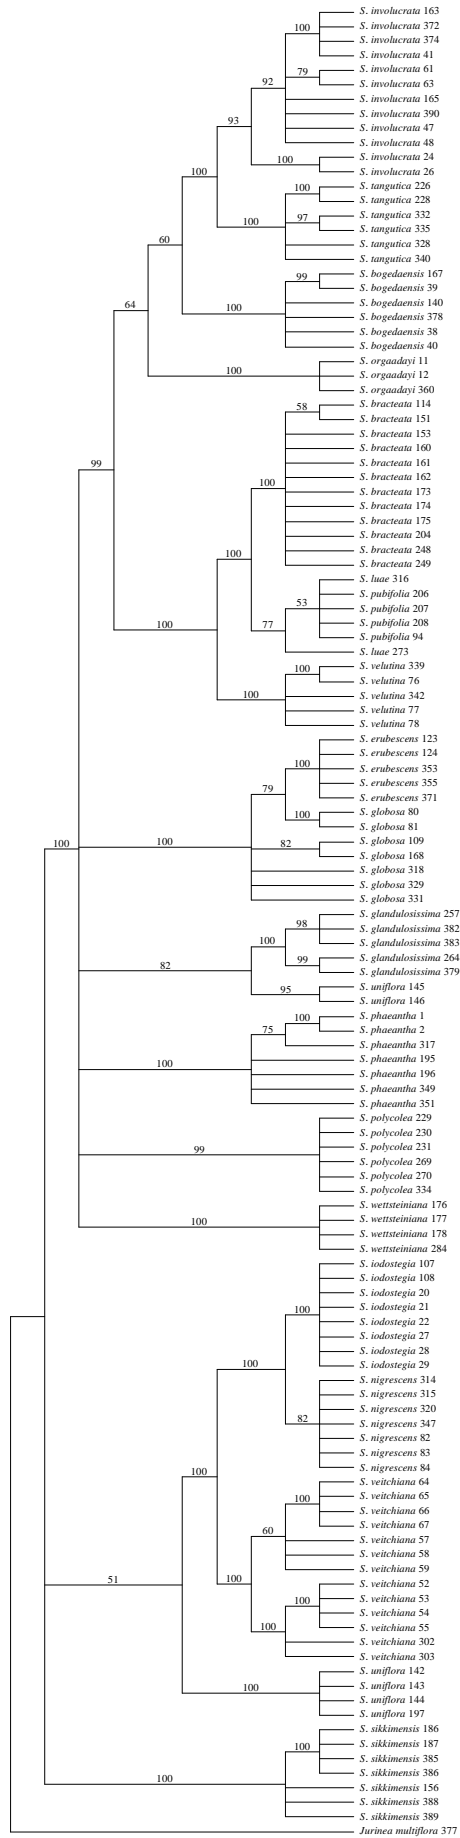

Supplement: Supporting_information.zip [file Supporting_information.zip]

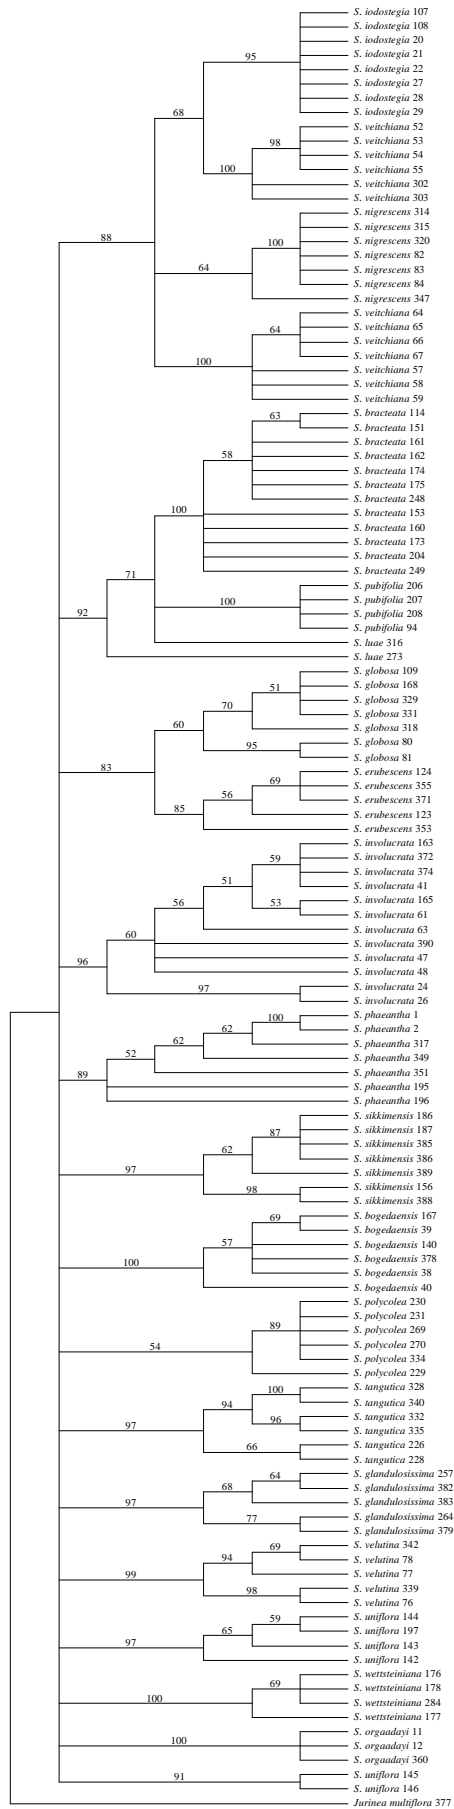

Supplement: Supporting_information.zip [file Supporting_information.zip]

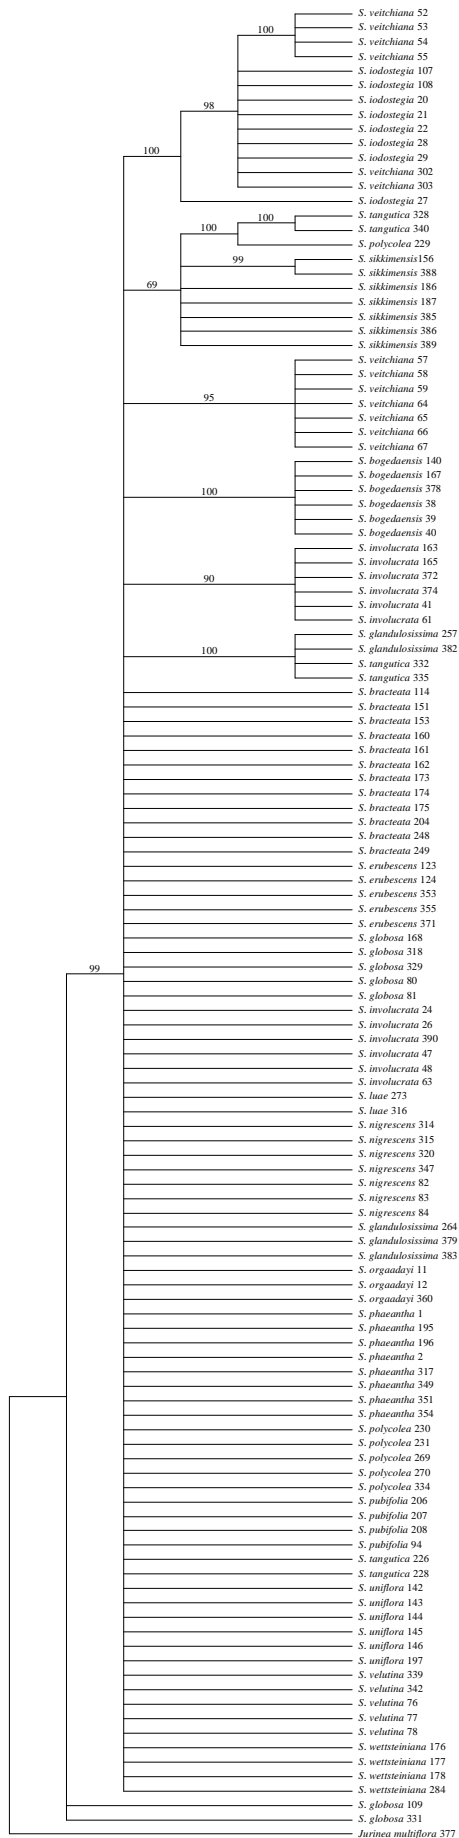

Supplement: Supporting_information.zip [file Supporting_information.zip]

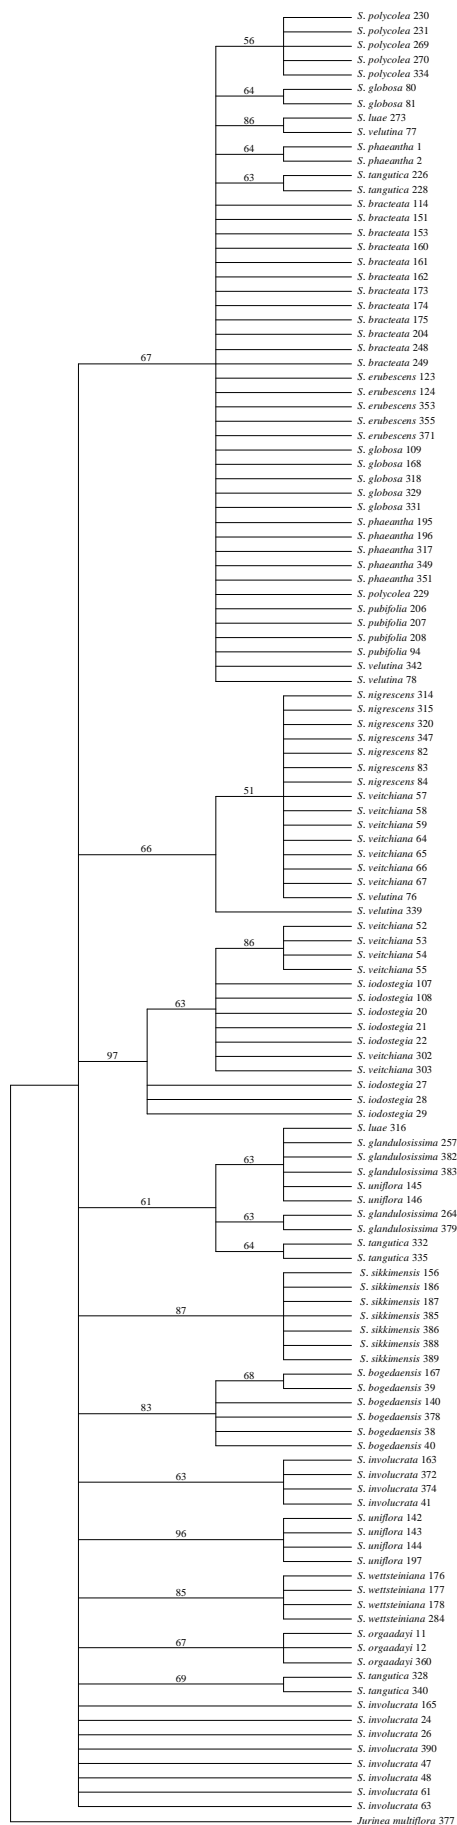

Supplement: Supporting_information.zip [file Supporting_information.zip]

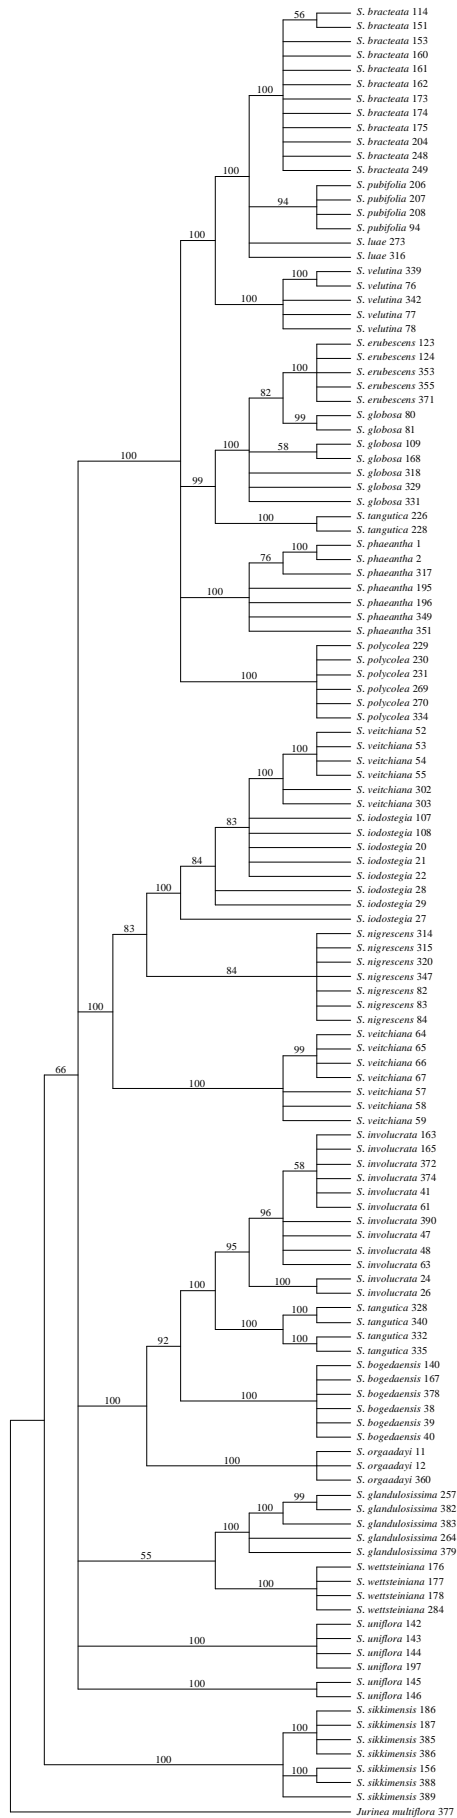

Supplement: Supporting_information.zip [file Supporting_information.zip]

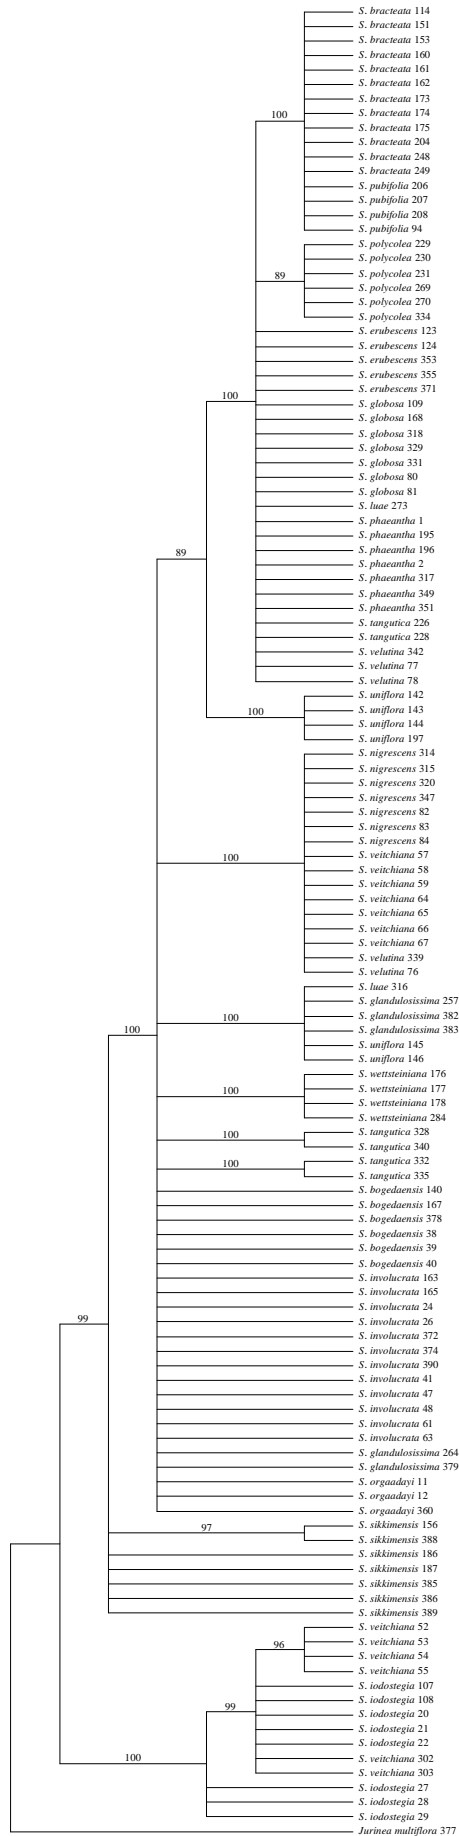

Supplement: Supporting_information.zip [file Supporting_information.zip]
